# Supplementary material for: Fast phage detection and quantification: An optical density-based approach
Source: PLoS One. 2019 May 9;14(5):e0216292. doi: 10.1371/journal.pone.0216292 (PMC6508699; doi:10.1371/journal.pone.0216292)
Supplement: S1 Dataset — Data have been used to build the graphs in Supplemental S1 Fig. A subset of the data has been used for Fig 2 of the paper. (XLSX) [file pone.0216292.s002.xlsx]

## Sheet: Description
This dataset contains the optical density (OD) vs time data corresponding to 90 different phage/bacteria combinations used in the paper "Fast phage detection and quantification: an optical density-based approach" by Denis Rajnovic, Xavier Muñoz Berbel and Jordi Mas
Data have been used to build the graphs in Supplemental Figure S1. A subset of the data has been used for Figure 2 of the paper.

## Sheet: 5x10^8 cfu per ml
5x10^8 cfu/ml
time	5x10^8 pfu/ml			5x10^7 pfu/ml			5x10^6 pfu/ml			5x10^5 pfu/ml			5x10^4 pfu/ml			5x10^3 pfu/ml			5x10^2 pfu/ml			5x10^1 pfu/ml			0 pfu/ml
5.5	0.715591	0.863116	0.811539	0.819523	0.831647	0.840128	0.8293	0.881295	0.895332	0.837624	0.896596	0.905773	0.812796	0.834088	0.832109	0.825196	0.846488	0.844509	0.824036	0.845328	0.843349	0.826036	0.847328	0.845349	0.828526	0.849818	0.847839
11	0.775554	0.826561	0.827968	0.830182	0.829353	0.835627	0.867884	0.834383	0.844254	0.854832	0.852288	0.848148	0.848028	0.779037	0.851022	0.860428	0.791437	0.863422	0.859268	0.790277	0.862262	0.861268	0.792277	0.864262	0.863758	0.794767	0.866752
16.5	0.80116	0.864178	0.849228	0.864769	0.857209	0.857596	0.90159	0.868688	0.872223	0.889272	0.891538	0.874099	0.883204	0.844755	0.876845	0.895604	0.857155	0.889245	0.894444	0.855995	0.888085	0.896444	0.857995	0.890085	0.898934	0.860485	0.892575
22	0.686681	0.806549	0.775346	0.87905	0.880437	0.883019	0.930726	0.896946	0.903155	0.920905	0.921646	0.908038	0.917133	0.885837	0.900438	0.929533	0.898237	0.912838	0.928373	0.897077	0.911678	0.930373	0.899077	0.913678	0.932863	0.901567	0.916168
27.5	0.586121	0.691775	0.65229	0.878348	0.876018	0.886495	0.950148	0.917997	0.926552	0.942029	0.947431	0.935473	0.940218	0.914885	0.920059	0.952618	0.927285	0.932459	0.951458	0.926125	0.931299	0.953458	0.928125	0.933299	0.955948	0.930615	0.935789
33	0.552827	0.637809	0.594818	0.875196	0.875387	0.883259	0.959724	0.937643	0.941033	0.953635	0.964087	0.949018	0.958058	0.93075	0.931894	0.970458	0.94315	0.944294	0.969298	0.94199	0.943134	0.971298	0.94399	0.945134	0.973788	0.94648	0.947624
38.5	0.545827	0.622055	0.576927	0.878244	0.880857	0.884465	0.96907	0.946987	0.950134	0.958662	0.97457	0.963694	0.969128	0.943935	0.942966	0.981528	0.956335	0.955366	0.980368	0.955175	0.954206	0.982368	0.957175	0.956206	0.984858	0.959665	0.958696
44	0.538286	0.608862	0.568429	0.881793	0.882059	0.882575	0.975048	0.952868	0.955648	0.974444	0.985244	0.971079	0.97804	0.954088	0.949446	0.99044	0.966488	0.961846	0.98928	0.965328	0.960686	0.99128	0.967328	0.962686	0.99377	0.969818	0.965176
49.5	0.533108	0.606251	0.566861	0.885763	0.885973	0.887741	0.982298	0.96367	0.963353	0.979796	0.991505	0.978012	0.98747	0.962931	0.961477	0.99987	0.975331	0.973877	0.99871	0.974171	0.972717	1.00071	0.976171	0.974717	1.0032	0.978661	0.977207
55	0.51016	0.60162	0.562068	0.887246	0.891063	0.892125	0.984059	0.971069	0.97003	0.986304	0.999514	0.984362	0.99154	0.9722	0.967605	1.00394	0.9846	0.980005	1.00278	0.98344	0.978845	1.00478	0.98544	0.980845	1.00727	0.98793	0.983335
66	0.41187	0.534241	0.482054	0.888553	0.883932	0.897931	0.977401	0.97328	0.970902	0.981715	0.997297	0.995993	0.98677	0.9793	0.971035	0.99917	0.9917	0.983435	0.99801	0.99054	0.982275	1.00001	0.99254	0.984275	1.0025	0.99503	0.986765
71.5	0.381921	0.49586	0.435451	0.884194	0.879092	0.889621	0.972747	0.967543	0.968099	0.982943	0.993982	0.994689	0.98778	0.976562	0.97088	1.00018	0.988962	0.98328	0.99902	0.987802	0.98212	1.00102	0.989802	0.98412	1.00351	0.992292	0.98661
77	0.363148	0.471295	0.408144	0.881707	0.875537	0.887172	0.973169	0.967405	0.966021	0.982731	0.993403	0.993225	0.98805	0.977838	0.968426	1.00045	0.990238	0.980826	0.99929	0.989078	0.979666	1.00129	0.991078	0.981666	1.00378	0.993568	0.984156
92.5	0.33547	0.429769	0.367864	0.872551	0.865981	0.874407	0.968234	0.965591	0.961197	0.981907	0.990023	0.988972	0.98704	0.980669	0.970278	0.99944	0.993069	0.982678	0.99828	0.991909	0.981518	1.00028	0.993909	0.983518	1.00277	0.996399	0.986008
99	0.33547	0.429769	0.367864	0.872551	0.865981	0.874407	0.968234	0.965591	0.961197	0.981907	0.990023	0.988972	0.98704	0.980669	0.970278	0.99944	0.993069	0.982678	0.99828	0.991909	0.981518	1.00028	0.993909	0.983518	1.00277	0.996399	0.986008
105.5	0.323579	0.41966	0.359492	0.86858	0.859807	0.869683	0.969121	0.965078	0.957796	0.982657	0.991758	0.988784	0.9866	0.980304	0.97013	0.999	0.992704	0.98253	0.99784	0.991544	0.98137	0.99984	0.993544	0.98337	1.00233	0.996034	0.98586
112	0.30937	0.412149	0.350438	0.86483	0.855373	0.86397	0.966616	0.963789	0.95281	0.986147	0.99118	0.988436	0.98969	0.982569	0.969541	1.00209	0.994969	0.981941	1.00093	0.993809	0.980781	1.00293	0.995809	0.982781	1.00542	0.998299	0.985271
118.5	0.294764	0.403454	0.340089	0.863367	0.85289	0.860088	0.968922	0.964726	0.952195	0.983556	0.992566	0.987934	0.9925	0.981951	0.96925	1.0049	0.994351	0.98165	1.00374	0.993191	0.98049	1.00574	0.995191	0.98249	1.00823	0.997681	0.98498
125	0.284436	0.393962	0.327635	0.861456	0.850104	0.859384	0.969784	0.964814	0.953581	0.989171	0.994013	0.989474	0.99782	0.983881	0.970092	1.01022	0.996281	0.982492	1.00906	0.995121	0.981332	1.01106	0.997121	0.983332	1.01355	0.999611	0.985822
131.5	0.275819	0.381214	0.313189	0.862028	0.848795	0.859477	0.967523	0.963274	0.95104	0.995487	0.992497	0.988789	1.00298	0.98788	0.970247	1.01538	1.00028	0.982647	1.01422	0.99912	0.981487	1.01622	1.00112	0.983487	1.01871	1.00361	0.985977
138	0.269682	0.360833	0.296976	0.865069	0.85074	0.85962	0.970877	0.966508	0.954123	0.999195	0.995904	0.989729	1.00585	0.99253	0.97493	1.01825	1.00493	0.98733	1.01709	1.00377	0.98617	1.01909	1.00577	0.98817	1.02158	1.00826	0.99066
144.5	0.264503	0.346318	0.287181	0.864943	0.850531	0.859691	0.974901	0.970383	0.95517	1.00211	1.0001	0.992471	1.00737	0.99478	0.975988	1.01977	1.00718	0.988388	1.01861	1.00602	0.987228	1.02061	1.00802	0.989228	1.0231	1.01051	0.991718
151	0.261779	0.33607	0.281633	0.864853	0.851868	0.860399	0.975595	0.970627	0.95692	1.00472	1.00338	0.994366	1.00935	0.99632	0.979621	1.02175	1.00872	0.992021	1.02059	1.00756	0.990861	1.02259	1.00956	0.992861	1.02508	1.01205	0.995351
157.5	0.259642	0.32898	0.277364	0.864655	0.851118	0.859771	0.977702	0.97344	0.958568	1.00502	1.00712	0.9969	1.01121	0.99792	0.98135	1.02361	1.01032	0.99375	1.02245	1.00916	0.99259	1.02445	1.01116	0.99459	1.02694	1.01365	0.99708
164	0.259109	0.321491	0.271989	0.864174	0.85106	0.859638	0.979428	0.974244	0.959458	1.00597	1.00732	0.997861	1.01158	0.99977	0.981615	1.02398	1.01217	0.994015	1.02282	1.01101	0.992855	1.02482	1.01301	0.994855	1.02731	1.0155	0.997345
180	0.252947	0.298574	0.261805	0.854352	0.84242	0.853035	0.977749	0.978193	0.960993	0.999214	1.01238	1.00199	1.00127	1.00061	0.976831	1.01367	1.01301	0.989231	1.01251	1.01185	0.988071	1.01451	1.01385	0.990071	1.017	1.01634	0.992561
185.5	0.254107	0.299055	0.263797	0.858459	0.848744	0.857515	0.979098	0.975474	0.958839	0.99756	1.00504	1.00128	1.00207	0.99266	0.9816	1.01447	1.00506	0.994	1.01331	1.0039	0.99284	1.01531	1.0059	0.99484	1.0178	1.00839	0.99733
191	0.253067	0.298148	0.262788	0.862522	0.845214	0.857758	0.974779	0.970474	0.959243	0.999346	1.00479	0.999854	1.0068	0.99523	0.98587	1.0192	1.00763	0.99827	1.01804	1.00647	0.99711	1.02004	1.00847	0.99911	1.02253	1.01096	1.0016
196.5	0.251635	0.297445	0.262114	0.86507	0.848554	0.859566	0.974361	0.972363	0.958801	1.0012	1.00809	0.9996	1.00939	0.9978	0.98434	1.02179	1.0102	0.99674	1.02063	1.00904	0.99558	1.02263	1.01104	0.99758	1.02512	1.01353	1.00007
202	0.249629	0.296066	0.260699	0.865535	0.848945	0.859395	0.976716	0.973052	0.95822	1.0066	1.00893	1.00012	1.01122	1.0007	0.983843	1.02362	1.0131	0.996243	1.02246	1.01194	0.995083	1.02446	1.01394	0.997083	1.02695	1.01643	0.999573
207.5	0.247545	0.29396	0.259558	0.865991	0.848019	0.859435	0.976342	0.975122	0.958315	1.00742	1.00888	1.00071	1.01218	1.00189	0.98424	1.02458	1.01429	0.99664	1.02342	1.01313	0.99548	1.02542	1.01513	0.99748	1.02791	1.01762	0.99997
213	0.245914	0.292971	0.25887	0.866793	0.848199	0.859583	0.977092	0.976651	0.956519	1.00669	1.0114	0.999882	1.01486	1.00243	0.98496	1.02726	1.01483	0.99736	1.0261	1.01367	0.9962	1.0281	1.01567	0.9982	1.03059	1.01816	1.00069
218.5	0.245089	0.291668	0.257663	0.866893	0.847986	0.860128	0.976633	0.976253	0.960023	1.00713	1.01256	1.00242	1.0171	1.00463	0.98609	1.0295	1.01703	0.99849	1.02834	1.01587	0.99733	1.03034	1.01787	0.99933	1.03283	1.02036	1.00182
224	0.243884	0.290861	0.256232	0.867576	0.847781	0.85969	0.978311	0.977184	0.95951	1.01124	1.012	1.004	1.01857	1.00523	0.98744	1.03097	1.01763	0.99984	1.02981	1.01647	0.99868	1.03181	1.01847	1.00068	1.0343	1.02096	1.00317
229.5	0.242938	0.290052	0.256007	0.867942	0.847788	0.859076	0.976311	0.98063	0.96328	1.01	1.01599	1.00553	1.02027	1.00605	0.98723	1.03267	1.01845	0.99963	1.03151	1.01729	0.99847	1.03351	1.01929	1.00047	1.036	1.02178	1.00296

## Sheet: 2.5x10^8 cfu per ml
2,5x10^8 cfu/ml
time	5x10^8 pfu/ml			5x10^7 pfu/ml			5x10^6 pfu/ml			5x10^5 pfu/ml			5x10^4 pfu/ml			5x10^3 pfu/ml			5x10^2 pfu/ml			5x10^1 pfu/ml			0 pfu/ml
5.5	0.435204	0.466695	0.45012	0.548248	0.493492	0.505599	0.498237	0.503786	0.485209	0.490017	0.518998	0.518982	0.488067	0.51131	0.491289	0.4931	0.516343	0.496322	0.49699	0.520233	0.500212	0.50262	0.525809	0.505788	0.50763	0.530873	0.510852
11	0.450417	0.463136	0.458132	0.445213	0.497395	0.478287	0.491417	0.508543	0.49307	0.508004	0.527372	0.510308	0.473118	0.50994	0.497322	0.478151	0.514973	0.502355	0.482041	0.518863	0.506245	0.487671	0.524439	0.511821	0.492681	0.529503	0.516885
16.5	0.459337	0.465811	0.460234	0.502679	0.516749	0.504212	0.493496	0.528907	0.511594	0.508214	0.533757	0.518747	0.499242	0.518391	0.509253	0.504275	0.523424	0.514286	0.508165	0.527314	0.518176	0.513795	0.53289	0.523752	0.518805	0.537954	0.528816
22	0.376554	0.379068	0.377779	0.517638	0.526385	0.517429	0.526614	0.553288	0.542045	0.519495	0.553911	0.546893	0.532799	0.548424	0.538406	0.537832	0.553457	0.543439	0.541722	0.557347	0.547329	0.547352	0.562923	0.552905	0.552362	0.567987	0.557969
27.5	0.298521	0.295941	0.3003	0.528052	0.52858	0.520855	0.566813	0.582811	0.571909	0.571788	0.590077	0.584651	0.574475	0.583908	0.577061	0.579508	0.588941	0.582094	0.583398	0.592831	0.585984	0.589028	0.598407	0.59156	0.594038	0.603471	0.596624
33	0.262884	0.257849	0.259521	0.534221	0.528234	0.51707	0.597976	0.615512	0.602941	0.617369	0.629805	0.623485	0.608708	0.621617	0.610758	0.613741	0.62665	0.615791	0.617631	0.63054	0.619681	0.623261	0.636116	0.625257	0.628271	0.64118	0.630321
38.5	0.249474	0.244366	0.244039	0.543536	0.536542	0.526416	0.62449	0.645156	0.63089	0.648488	0.659878	0.656047	0.63954	0.654285	0.641638	0.644573	0.659318	0.646671	0.648463	0.663208	0.650561	0.654093	0.668784	0.656137	0.659103	0.673848	0.661201
44	0.244225	0.237161	0.237206	0.557535	0.549238	0.539683	0.653415	0.673377	0.659589	0.673387	0.687368	0.683481	0.663228	0.681435	0.670565	0.668261	0.686468	0.675598	0.672151	0.690358	0.679488	0.677781	0.695934	0.685064	0.682791	0.700998	0.690128
49.5	0.227831	0.220956	0.221796	0.565992	0.560104	0.550499	0.670123	0.688328	0.678296	0.689871	0.707797	0.699353	0.68318	0.700248	0.685867	0.688213	0.705281	0.6909	0.692103	0.709171	0.69479	0.697733	0.714747	0.700366	0.702743	0.719811	0.70543
55	0.200451	0.195102	0.195262	0.565757	0.561164	0.552892	0.682464	0.696627	0.691156	0.701636	0.722771	0.717091	0.694846	0.711609	0.703376	0.699879	0.716642	0.708409	0.703769	0.720532	0.712299	0.709399	0.726108	0.717875	0.714409	0.731172	0.722939
66	0.175224	0.173875	0.170523	0.517136	0.506741	0.508975	0.70355	0.715208	0.712745	0.730068	0.742401	0.739729	0.726821	0.729788	0.727471	0.731854	0.734821	0.732504	0.735744	0.738711	0.736394	0.741374	0.744287	0.74197	0.746384	0.749351	0.747034
71.5	0.172593	0.171178	0.167566	0.491046	0.479658	0.480983	0.705716	0.717126	0.713801	0.741706	0.750514	0.749524	0.737168	0.742007	0.73648	0.742201	0.74704	0.741513	0.746091	0.75093	0.745403	0.751721	0.756506	0.750979	0.756731	0.76157	0.756043
77	0.170249	0.169724	0.166038	0.473539	0.462153	0.462505	0.705478	0.715468	0.714144	0.743557	0.753655	0.749676	0.74108	0.744467	0.738653	0.746113	0.7495	0.743686	0.750003	0.75339	0.747576	0.755633	0.758966	0.753152	0.760643	0.76403	0.758216
92.5	0.166625	0.167662	0.163167	0.435451	0.422872	0.424369	0.70902	0.717703	0.716022	0.755574	0.765186	0.758526	0.754065	0.757128	0.753301	0.759098	0.762161	0.758334	0.762988	0.766051	0.762224	0.768618	0.771627	0.7678	0.773628	0.776691	0.772864
99	0.166625	0.167662	0.163167	0.435451	0.422872	0.424369	0.70902	0.717703	0.716022	0.755574	0.765186	0.758526	0.754065	0.757128	0.753301	0.759098	0.762161	0.758334	0.762988	0.766051	0.762224	0.768618	0.771627	0.7678	0.773628	0.776691	0.772864
105.5	0.165392	0.166796	0.161727	0.415636	0.401536	0.404719	0.706214	0.716219	0.714238	0.755605	0.764184	0.761996	0.753892	0.759823	0.754849	0.758925	0.764856	0.759882	0.762815	0.768746	0.763772	0.768445	0.774322	0.769348	0.773455	0.779386	0.774412
112	0.164465	0.166208	0.161944	0.381147	0.367454	0.37085	0.705628	0.718188	0.713734	0.760267	0.765238	0.764077	0.757743	0.763191	0.756625	0.762776	0.768224	0.761658	0.766666	0.772114	0.765548	0.772296	0.77769	0.771124	0.777306	0.782754	0.776188
118.5	0.163929	0.166031	0.161126	0.346706	0.326968	0.334801	0.708939	0.720415	0.714746	0.760552	0.767963	0.767519	0.759126	0.764958	0.760145	0.764159	0.769991	0.765178	0.768049	0.773881	0.769068	0.773679	0.779457	0.774644	0.778689	0.784521	0.779708
125	0.163088	0.165648	0.160188	0.316228	0.292126	0.30316	0.705917	0.718117	0.717449	0.76031	0.767501	0.766148	0.759918	0.764584	0.76164	0.764951	0.769617	0.766673	0.768841	0.773507	0.770563	0.774471	0.779083	0.776139	0.779481	0.784147	0.781203
131.5	0.162122	0.165359	0.160128	0.291409	0.265684	0.279259	0.705381	0.716399	0.716301	0.760859	0.768892	0.765678	0.760767	0.765862	0.763966	0.7658	0.770895	0.768999	0.76969	0.774785	0.772889	0.77532	0.780361	0.778465	0.78033	0.785425	0.783529
138	0.161371	0.164668	0.159357	0.273247	0.246334	0.260068	0.707219	0.717349	0.715595	0.763639	0.768303	0.76594	0.763683	0.76639	0.766956	0.768716	0.771423	0.771989	0.772606	0.775313	0.775879	0.778236	0.780889	0.781455	0.783246	0.785953	0.786519
144.5	0.160662	0.163794	0.158811	0.258749	0.230992	0.24564	0.70673	0.715578	0.715535	0.765924	0.769358	0.766028	0.764464	0.768332	0.769326	0.769497	0.773365	0.774359	0.773387	0.777255	0.778249	0.779017	0.782831	0.783825	0.784027	0.787895	0.788889
151	0.160853	0.164274	0.158407	0.248315	0.220488	0.234265	0.704924	0.715224	0.714382	0.768399	0.76982	0.767594	0.767427	0.770629	0.772269	0.77246	0.775662	0.777302	0.77635	0.779552	0.781192	0.78198	0.785128	0.786768	0.78699	0.790192	0.791832
157.5	0.160258	0.164095	0.157852	0.240612	0.212474	0.226307	0.703566	0.71619	0.714788	0.769987	0.771741	0.770552	0.768898	0.771299	0.775403	0.773931	0.776332	0.780436	0.777821	0.780222	0.784326	0.783451	0.785798	0.789902	0.788461	0.790862	0.794966
164	0.159926	0.162988	0.157711	0.235802	0.207367	0.221156	0.704279	0.713823	0.716179	0.772831	0.774795	0.772571	0.771686	0.774705	0.777687	0.776719	0.779738	0.78272	0.780609	0.783628	0.78661	0.786239	0.789204	0.792186	0.791249	0.794268	0.79725
180	0.158852	0.162344	0.156467	0.229734	0.198178	0.215201	0.701398	0.716354	0.711017	0.783507	0.776233	0.780547	0.781511	0.779247	0.782498	0.786544	0.78428	0.787531	0.790434	0.78817	0.791421	0.796064	0.793746	0.796997	0.801074	0.79881	0.802061
185.5	0.159591	0.162827	0.157786	0.22848	0.195287	0.214195	0.693732	0.708356	0.711406	0.77594	0.778497	0.77686	0.777801	0.784063	0.786201	0.782834	0.789096	0.791234	0.786724	0.792986	0.795124	0.792354	0.798562	0.8007	0.797364	0.803626	0.805764
191	0.159696	0.16289	0.157192	0.226992	0.193523	0.212644	0.699446	0.712819	0.712026	0.784707	0.779483	0.780305	0.782772	0.784929	0.791854	0.787805	0.789962	0.796887	0.791695	0.793852	0.800777	0.797325	0.799428	0.806353	0.802335	0.804492	0.811417
196.5	0.159364	0.162685	0.157013	0.226216	0.192092	0.210735	0.700018	0.713321	0.712627	0.784748	0.781892	0.783836	0.782598	0.786151	0.794084	0.787631	0.791184	0.799117	0.791521	0.795074	0.803007	0.797151	0.80065	0.808583	0.802161	0.805714	0.813647
202	0.159174	0.162179	0.157015	0.224909	0.190587	0.209541	0.70043	0.714771	0.710676	0.785158	0.785729	0.784356	0.78518	0.786948	0.796289	0.790213	0.791981	0.801322	0.794103	0.795871	0.805212	0.799733	0.801447	0.810788	0.804743	0.806511	0.815852
207.5	0.159321	0.162195	0.156205	0.222561	0.188863	0.206664	0.699391	0.71464	0.709771	0.786732	0.786054	0.785893	0.785767	0.786324	0.798118	0.7908	0.791357	0.803151	0.79469	0.795247	0.807041	0.80032	0.800823	0.812617	0.80533	0.805887	0.817681
213	0.15897	0.16203	0.156758	0.220106	0.187265	0.204118	0.69796	0.713919	0.708122	0.78701	0.787251	0.78703	0.786572	0.790664	0.801019	0.791605	0.795697	0.806052	0.795495	0.799587	0.809942	0.801125	0.805163	0.815518	0.806135	0.810227	0.820582
218.5	0.159168	0.162393	0.157057	0.21765	0.185699	0.202547	0.696558	0.713349	0.707682	0.79116	0.792645	0.789374	0.7898	0.795399	0.804959	0.794833	0.800432	0.809992	0.798723	0.804322	0.813882	0.804353	0.809898	0.819458	0.809363	0.814962	0.824522
224	0.159182	0.162508	0.156545	0.215741	0.184632	0.200869	0.694361	0.712949	0.705806	0.790809	0.79321	0.788795	0.792013	0.796413	0.80842	0.797046	0.801446	0.813453	0.800936	0.805336	0.817343	0.806566	0.810912	0.822919	0.811576	0.815976	0.827983
229.5	0.159083	0.16185	0.156404	0.21403	0.183896	0.199788	0.689682	0.709992	0.703516	0.795045	0.79695	0.793092	0.791261	0.798389	0.810819	0.796294	0.803422	0.815852	0.800184	0.807312	0.819742	0.805814	0.812888	0.825318	0.810824	0.817952	0.830382

## Sheet: 10^8 cfu per ml
10^8 cfu/ml
time	5x10^8 pfu/ml			5x10^7 pfu/ml			5x10^6 pfu/ml			5x10^5 pfu/ml			5x10^4 pfu/ml			5x10^3 pfu/ml			5x10^2 pfu/ml			5x10^1 pfu/ml			0 pfu/ml
5	0.251236	0.256776	0.255103	0.264259	0.263641	0.272685	0.269744	0.266842	0.274186	0.254535	0.273592	0.267686	0.281733	0.289271	0.286938	0.257548	0.28793	0.277994	0.27904	0.2867	0.282905	0.281582	0.277134	0.282982	0.283592	0.279144	0.284992
10	0.256122	0.257554	0.254735	0.265495	0.266457	0.267033	0.268597	0.267066	0.273924	0.256395	0.272782	0.274099	0.280765	0.293996	0.281405	0.255997	0.279541	0.277686	0.279081	0.283731	0.27965	0.288685	0.287129	0.283611	0.290695	0.289139	0.285621
15	0.255434	0.25551	0.253926	0.267754	0.268865	0.26819	0.275997	0.274903	0.281755	0.263082	0.280238	0.283127	0.288608	0.299957	0.290862	0.263257	0.284352	0.287423	0.288459	0.294156	0.290839	0.300193	0.298984	0.300316	0.302203	0.300994	0.302326
20	0.231477	0.235215	0.232324	0.273656	0.273723	0.275066	0.28764	0.287994	0.294157	0.273738	0.286922	0.292608	0.301561	0.312607	0.299612	0.275912	0.293361	0.297471	0.305	0.309	0.305102	0.322433	0.317995	0.317675	0.324443	0.320005	0.319685
25	0.165019	0.16918	0.164885	0.262343	0.262552	0.264704	0.304404	0.304261	0.307882	0.289968	0.304701	0.308437	0.319418	0.330717	0.316817	0.290121	0.312541	0.317804	0.325296	0.328458	0.325946	0.345048	0.339358	0.342235	0.347058	0.341368	0.344245
30	0.139335	0.14164	0.140651	0.244689	0.245704	0.245384	0.321246	0.319327	0.327453	0.30805	0.326747	0.331204	0.34337	0.351948	0.340742	0.311939	0.337482	0.340595	0.349881	0.353022	0.351696	0.376951	0.37252	0.373359	0.378961	0.37453	0.375369
35	0.128048	0.12957	0.129393	0.236963	0.235717	0.23723	0.345583	0.344329	0.349414	0.335445	0.35366	0.35585	0.370968	0.378118	0.36675	0.338991	0.368212	0.369886	0.384244	0.384772	0.383758	0.415559	0.409867	0.409127	0.417569	0.411877	0.411137
40	0.123315	0.125321	0.124935	0.234474	0.232544	0.235172	0.3744	0.374287	0.377973	0.366655	0.384338	0.39007	0.405882	0.40746	0.397019	0.369521	0.402565	0.405212	0.422321	0.423742	0.417855	0.451892	0.445058	0.444685	0.453902	0.447068	0.446695
45	0.120049	0.122338	0.123083	0.237516	0.234671	0.237214	0.402304	0.399948	0.406823	0.397809	0.415439	0.424372	0.438803	0.43991	0.433681	0.402872	0.436427	0.441736	0.458017	0.462665	0.456699	0.487015	0.480931	0.482203	0.489025	0.482941	0.484213
50	0.11873	0.120319	0.121119	0.24013	0.237603	0.240289	0.4329	0.431666	0.435344	0.434045	0.44906	0.459925	0.480992	0.477708	0.468803	0.441091	0.472811	0.477352	0.496815	0.497302	0.495554	0.516327	0.50968	0.511075	0.518337	0.51169	0.513085
55	0.117701	0.119218	0.11963	0.231805	0.231073	0.232808	0.458473	0.45535	0.461982	0.463694	0.478043	0.488897	0.511052	0.503871	0.50014	0.473131	0.503017	0.507128	0.525463	0.524473	0.520779	0.543099	0.533249	0.535789	0.545109	0.535259	0.537799
60	0.115957	0.118202	0.118909	0.215018	0.214588	0.218372	0.47303	0.471814	0.478547	0.486305	0.500025	0.514775	0.531806	0.52729	0.526058	0.496398	0.526487	0.531343	0.551717	0.55341	0.550328	0.565324	0.554332	0.562198	0.567334	0.556342	0.564208
65	0.115607	0.117585	0.117999	0.19919	0.197859	0.201559	0.48534	0.485267	0.489908	0.513335	0.5232	0.538579	0.560155	0.548767	0.549016	0.52523	0.549161	0.557899	0.576173	0.577493	0.575624	0.578416	0.56601	0.577813	0.580426	0.56802	0.579823
70	0.115617	0.117467	0.117393	0.186729	0.185019	0.187939	0.496858	0.495346	0.502411	0.535299	0.540942	0.562641	0.583183	0.569675	0.575396	0.548663	0.571186	0.580518	0.595865	0.594988	0.595135	0.59278	0.580921	0.589865	0.59479	0.582931	0.591875
75	0.114977	0.117293	0.117175	0.178316	0.176215	0.17899	0.500886	0.500628	0.507185	0.550064	0.552211	0.573851	0.596594	0.581754	0.589191	0.564579	0.582624	0.595091	0.607218	0.606474	0.606815	0.599542	0.589962	0.602376	0.601552	0.591972	0.604386
80	0.114605	0.116953	0.117337	0.168287	0.166772	0.169491	0.50559	0.508208	0.511514	0.562157	0.563916	0.586448	0.610973	0.594183	0.60278	0.580108	0.597513	0.609075	0.62079	0.620092	0.620635	0.61145	0.595867	0.612556	0.61346	0.597877	0.614566
85	0.114417	0.116844	0.117165	0.153882	0.153294	0.156218	0.508641	0.508465	0.515464	0.5727	0.572663	0.597803	0.623088	0.604497	0.614785	0.592524	0.607109	0.619579	0.632203	0.631646	0.630736	0.618862	0.606517	0.621828	0.620872	0.608527	0.623838
90	0.114423	0.116775	0.117123	0.143092	0.142321	0.143672	0.504163	0.505693	0.51117	0.580208	0.578607	0.604186	0.632378	0.614157	0.624425	0.605152	0.614226	0.62892	0.639228	0.640045	0.640373	0.625367	0.613265	0.629081	0.627377	0.615275	0.631091
95	0.11406	0.115978	0.11655	0.137332	0.136356	0.137262	0.491265	0.493357	0.500125	0.583301	0.583902	0.606898	0.64068	0.621457	0.632616	0.612145	0.622713	0.637284	0.647449	0.64796	0.649264	0.632165	0.615881	0.635864	0.634175	0.617891	0.637874
100	0.114623	0.116571	0.116714	0.134945	0.133312	0.13437	0.469406	0.475449	0.481321	0.588485	0.590364	0.610214	0.647722	0.627844	0.643552	0.616833	0.628957	0.645859	0.657027	0.658015	0.657246	0.639732	0.622846	0.639066	0.641742	0.624856	0.641076
105	0.114376	0.116092	0.116307	0.132701	0.132187	0.13181	0.447207	0.452761	0.457527	0.589405	0.593853	0.613457	0.655417	0.633533	0.645912	0.628198	0.636565	0.651983	0.664157	0.664016	0.663426	0.642565	0.626932	0.646518	0.644575	0.628942	0.648528
110	0.113815	0.115951	0.116872	0.131942	0.130323	0.131596	0.422371	0.430164	0.432325	0.588425	0.595362	0.614816	0.661315	0.640708	0.654937	0.634303	0.643188	0.658655	0.670269	0.670923	0.669846	0.647917	0.628367	0.649498	0.649927	0.630377	0.651508
115	0.113786	0.116276	0.116655	0.130204	0.128799	0.130199	0.396754	0.406535	0.408031	0.589838	0.600091	0.613511	0.667154	0.646922	0.660613	0.64173	0.648198	0.665833	0.672754	0.673743	0.673414	0.65404	0.63086	0.655894	0.65605	0.63287	0.657904
120	0.114278	0.11625	0.117232	0.129564	0.127644	0.129233	0.368721	0.380302	0.378598	0.586885	0.598831	0.615213	0.665195	0.647939	0.665841	0.649317	0.651789	0.669151	0.676264	0.67965	0.677902	0.65218	0.634552	0.657042	0.65419	0.636562	0.659052
125	0.113726	0.115722	0.117071	0.128585	0.127125	0.12866	0.336334	0.349399	0.347746	0.581798	0.598457	0.611438	0.669104	0.649988	0.667407	0.647786	0.654678	0.675737	0.677737	0.682313	0.681134	0.652194	0.639829	0.656999	0.654204	0.641839	0.659009
130	0.11354	0.115454	0.116023	0.127761	0.126172	0.127024	0.300779	0.31451	0.31147	0.574879	0.596884	0.609577	0.673572	0.654234	0.671525	0.655789	0.659445	0.679898	0.68042	0.685335	0.68532	0.655085	0.641544	0.660685	0.657095	0.643554	0.662695
135	0.113536	0.115852	0.116372	0.127054	0.125552	0.126462	0.267057	0.281369	0.275756	0.568739	0.593375	0.605988	0.672951	0.656966	0.673093	0.657228	0.663297	0.678784	0.685511	0.688295	0.686576	0.656373	0.63735	0.658396	0.658383	0.63936	0.660406
140	0.113436	0.115551	0.116165	0.126774	0.125047	0.125435	0.239209	0.251619	0.24587	0.564351	0.590402	0.60379	0.674129	0.658605	0.674943	0.658996	0.666122	0.682129	0.686509	0.688342	0.686964	0.65496	0.641423	0.659926	0.65697	0.643433	0.661936
145	0.113158	0.11582	0.115535	0.126262	0.124368	0.125153	0.217681	0.228314	0.220557	0.551664	0.586082	0.593917	0.675788	0.658915	0.678958	0.661121	0.666457	0.681808	0.68784	0.689594	0.687967	0.658536	0.640849	0.663843	0.660546	0.642859	0.665853
150	0.113182	0.11559	0.116635	0.125104	0.123779	0.125059	0.201069	0.210343	0.203454	0.546029	0.581302	0.590658	0.676985	0.660226	0.678273	0.665205	0.673053	0.686327	0.689806	0.693234	0.69305	0.659072	0.640853	0.665067	0.661082	0.642863	0.667077
155	0.112675	0.115347	0.115614	0.124622	0.123301	0.123897	0.189629	0.19772	0.189263	0.536476	0.577119	0.584688	0.67722	0.661037	0.679749	0.666747	0.669921	0.686421	0.690393	0.691915	0.692237	0.656461	0.647116	0.663896	0.658471	0.649126	0.665906
160	0.112412	0.115313	0.115347	0.123964	0.122971	0.123705	0.181017	0.188216	0.179846	0.527395	0.57249	0.576917	0.678518	0.662595	0.681377	0.670965	0.673151	0.690257	0.693449	0.695399	0.692545	0.662999	0.651863	0.667333	0.665009	0.653873	0.669343
165	0.112757	0.115271	0.115308	0.123543	0.122839	0.123403	0.174181	0.181146	0.172527	0.516092	0.566367	0.568129	0.677414	0.664777	0.681103	0.671509	0.674912	0.691811	0.695639	0.697999	0.696126	0.660697	0.647525	0.670232	0.662707	0.649535	0.672242
170	0.112383	0.115066	0.115376	0.123137	0.122411	0.123037	0.168622	0.175684	0.166338	0.503442	0.559115	0.559725	0.679163	0.664461	0.6813	0.673582	0.678335	0.692733	0.699878	0.701301	0.699421	0.662658	0.654514	0.670609	0.664668	0.656524	0.672619
175	0.112849	0.115063	0.116141	0.122548	0.12251	0.122549	0.163709	0.170679	0.161647	0.491946	0.551854	0.552016	0.678915	0.664604	0.680888	0.673668	0.676478	0.696399	0.700673	0.702231	0.700557	0.667368	0.658373	0.675374	0.669378	0.660383	0.677384
180	0.112155	0.114703	0.115475	0.122552	0.122258	0.122655	0.159528	0.166186	0.156911	0.477708	0.543947	0.54282	0.678514	0.666812	0.680555	0.675876	0.679711	0.699167	0.702559	0.703977	0.702763	0.670741	0.659817	0.676269	0.672751	0.661827	0.678279
185	0.112337	0.114484	0.114794	0.122192	0.121797	0.121895	0.155629	0.162274	0.153106	0.46456	0.534939	0.531168	0.680414	0.667538	0.680773	0.67938	0.68085	0.699905	0.704482	0.706929	0.705529	0.670103	0.661857	0.676372	0.672113	0.663867	0.678382
190	0.112234	0.11435	0.115749	0.121672	0.121672	0.122402	0.151915	0.158525	0.149843	0.45132	0.526004	0.521594	0.682287	0.668649	0.681629	0.679098	0.682452	0.702719	0.708806	0.711033	0.708097	0.674701	0.667171	0.681721	0.676711	0.669181	0.683731
195	0.112384	0.114632	0.115508	0.121394	0.121812	0.12174	0.149083	0.155097	0.146799	0.437693	0.515418	0.510604	0.681785	0.670751	0.682504	0.681261	0.68544	0.705906	0.711059	0.714755	0.711383	0.677647	0.67056	0.682805	0.679657	0.67257	0.684815
200	0.112782	0.114732	0.115268	0.121546	0.121111	0.121399	0.146606	0.152113	0.144894	0.423079	0.504098	0.496782	0.682969	0.672775	0.680724	0.684712	0.688051	0.707589	0.714197	0.715469	0.71321	0.682573	0.67449	0.688023	0.684583	0.6765	0.690033
205	0.112532	0.114877	0.115747	0.121048	0.120824	0.121057	0.144185	0.149268	0.142477	0.40936	0.493208	0.486082	0.68248	0.672943	0.679155	0.685141	0.688055	0.710968	0.717614	0.719888	0.71693	0.686862	0.678131	0.691389	0.688872	0.680141	0.693399
210	0.113053	0.11512	0.116151	0.120835	0.121057	0.121078	0.142587	0.146732	0.141216	0.394939	0.480081	0.47476	0.681667	0.674022	0.682508	0.687852	0.690797	0.712105	0.718967	0.722228	0.719858	0.6891	0.680977	0.694505	0.69111	0.682987	0.696515
215	0.112845	0.115088	0.116356	0.120686	0.12093	0.120874	0.140828	0.144845	0.139727	0.380384	0.466919	0.460326	0.68302	0.674472	0.68242	0.687522	0.696106	0.715543	0.723014	0.727244	0.724576	0.690662	0.681228	0.69748	0.692672	0.683238	0.69949
220	0.112773	0.115442	0.116462	0.12047	0.120455	0.120649	0.139562	0.142491	0.138731	0.367	0.453258	0.448288	0.683594	0.674371	0.680313	0.689455	0.69703	0.716566	0.725941	0.729963	0.727228	0.694665	0.683155	0.699484	0.696675	0.685165	0.701494
225	0.113106	0.115466	0.116716	0.120562	0.121017	0.121261	0.13877	0.14097	0.138734	0.354619	0.438439	0.436452	0.679723	0.677423	0.682861	0.690883	0.699573	0.720131	0.728161	0.734408	0.730311	0.696829	0.684855	0.702178	0.698839	0.686865	0.704188
230	0.11267	0.114755	0.115884	0.119916	0.12014	0.120811	0.138237	0.139749	0.137655	0.341923	0.420777	0.422751	0.682986	0.676848	0.681316	0.693876	0.699876	0.724226	0.734007	0.736689	0.734602	0.696855	0.694613	0.705853	0.698865	0.696623	0.707863
235	0.112817	0.115099	0.116643	0.120296	0.120511	0.121364	0.13768	0.138836	0.137385	0.329804	0.401996	0.4074	0.681134	0.67628	0.678134	0.695925	0.705184	0.725874	0.736741	0.740954	0.737379	0.701667	0.696663	0.709326	0.703677	0.698673	0.711336
240	0.112659	0.115069	0.116616	0.120059	0.120209	0.120471	0.13773	0.138215	0.137299	0.319816	0.384289	0.392523	0.679489	0.678079	0.677524	0.698048	0.7059	0.728552	0.737907	0.743334	0.739527	0.704901	0.699394	0.710843	0.706911	0.701404	0.712853
245	0.113806	0.116531	0.117923	0.11962	0.120227	0.120531	0.137641	0.137494	0.137701	0.31253	0.370346	0.375831	0.676023	0.676551	0.675474	0.700739	0.705778	0.731091	0.742408	0.745185	0.742392	0.707313	0.702185	0.713403	0.709323	0.704195	0.715413
250	0.112923	0.115551	0.116949	0.119784	0.120046	0.120464	0.137489	0.137184	0.137904	0.309171	0.360228	0.362493	0.676295	0.67479	0.675042	0.700326	0.711556	0.736059	0.742144	0.748369	0.744924	0.710428	0.704385	0.715679	0.712438	0.706395	0.717689
255	0.113546	0.115709	0.116977	0.119658	0.119842	0.11965	0.137238	0.137033	0.137437	0.307875	0.354875	0.352385	0.672715	0.673843	0.672824	0.698795	0.712942	0.73465	0.745284	0.749735	0.748254	0.71218	0.703322	0.717677	0.71419	0.705332	0.719687

## Sheet: 5x10^7 cfu per ml
5x10^7 cfu/ml
time	5x10^8 pfu/ml			5x10^7 pfu/ml			5x10^6 pfu/ml			5x10^5 pfu/ml			5x10^4 pfu/ml			5x10^3 pfu/ml			5x10^2 pfu/ml			5x10^1 pfu/ml			0 pfu/ml
3.5	0.172096	0.172478	0.184257	0.17339	0.174372	0.181441	0.169662	0.170806	0.175125	0.172633	0.172704	0.176434	0.181191	0.198562	0.211286	0.190425	0.183479	0.19276	0.182959	0.181139	0.196905	0.165885	0.170203	0.178359	0.174705	0.179023	0.187179
14	0.172123	0.173557	0.182408	0.176426	0.176994	0.184023	0.174166	0.173121	0.180545	0.177635	0.176864	0.181754	0.18273	0.201045	0.217972	0.193521	0.185785	0.198111	0.18707	0.185024	0.200398	0.171907	0.1777	0.186807	0.180727	0.18652	0.195627
24.5	0.152488	0.14838	0.14581	0.181122	0.181258	0.186107	0.184872	0.184738	0.195158	0.187753	0.188904	0.197197	0.195684	0.211456	0.232282	0.204608	0.198391	0.214835	0.203127	0.204722	0.217246	0.191421	0.20187	0.209529	0.200241	0.21069	0.218349
31.5	0.11648	0.117456	0.124044	0.160686	0.159157	0.159715	0.196724	0.197849	0.207632	0.205034	0.208316	0.218488	0.213336	0.232774	0.251033	0.222439	0.213944	0.236511	0.223993	0.226319	0.240687	0.216591	0.226605	0.242044	0.225411	0.235425	0.250864
42	0.109667	0.111582	0.117113	0.14698	0.146955	0.152295	0.215106	0.218592	0.231062	0.23146	0.235432	0.251092	0.240689	0.260738	0.285719	0.252879	0.242484	0.269264	0.259897	0.26008	0.273289	0.253992	0.268225	0.281595	0.262812	0.277045	0.290415
52.5	0.107727	0.110137	0.11634	0.145287	0.146242	0.149891	0.244798	0.250667	0.268314	0.269546	0.274529	0.295635	0.280834	0.302298	0.331576	0.292173	0.282146	0.316826	0.302779	0.305483	0.321423	0.303136	0.315396	0.334164	0.311956	0.324216	0.342984
59.5	0,154999*	0,164423*	0,143439*	0,186474*	0,194513*	0,208469*	0.299435	0.320934	0.309535	0.303625	0.34263	0.336015	0.318504	0.359893	0.365291	0.328265	0.339467	0.357107	0.350842	0.372455	0.361866	0.352465	0.358537	0.381156	0.361285	0.367357	0.389976
70	0.112145	0.11254	0.120029	0.137455	0.138425	0.142245	0.297313	0.31033	0.32801	0.343754	0.355667	0.378428	0.361425	0.383126	0.417295	0.37415	0.364995	0.404058	0.387821	0.395108	0.407936	0.399449	0.408514	0.428075	0.408269	0.417334	0.436895
80.5	0.112092	0.112504	0.119705	0.130436	0.131555	0.134495	0.322843	0.33823	0.349689	0.388915	0.398538	0.419525	0.406951	0.427102	0.460097	0.421158	0.410951	0.448083	0.437043	0.442064	0.455369	0.449411	0.458953	0.480056	0.458231	0.467773	0.488876
94.5	0.110611	0.111065	0.118394	0.120872	0.123398	0.125068	0.339611	0.34824	0.354236	0.437467	0.450368	0.467226	0.465762	0.487382	0.523804	0.480806	0.469876	0.513247	0.5068	0.506089	0.516602	0.512242	0.515691	0.532781	0.521062	0.524511	0.541601
105	0.109925	0.111599	0.11761	0.114976	0.118167	0.1199	0.32444	0.327304	0.317057	0.467059	0.476126	0.49003	0.504947	0.526618	0.556968	0.519756	0.509836	0.547492	0.540946	0.543595	0.550988	0.543971	0.547227	0.564463	0.552791	0.556047	0.573283
115.5	0.109289	0.110591	0.116879	0.112386	0.115814	0.118395	0.260815	0.255097	0.220912	0.474578	0.480531	0.489112	0.534139	0.558049	0.582168	0.553468	0.542058	0.575263	0.570076	0.573795	0.580364	0.572744	0.575376	0.589736	0.581564	0.584196	0.598556
126	0.109164	0.109958	0.11684	0.11081	0.114984	0.118187	0.181123	0.173318	0.154122	0.465262	0.473034	0.466758	0.55873	0.57957	0.602811	0.581377	0.569654	0.602133	0.597826	0.600217	0.603486	0.593166	0.5947	0.606623	0.601986	0.60352	0.615443
129.5	0.109167	0.110038	0.11747	0.111647	0.114616	0.117101	0.150588	0.146111	0.138803	0.457502	0.454755	0.436213	0.56913	0.591064	0.609028	0.593802	0.579909	0.613998	0.613277	0.611737	0.616232	0.604441	0.602064	0.613367	0.613261	0.610884	0.622187
143.5	0.108216	0.109648	0.117103	0.110312	0.113754	0.117013	0.127542	0.127264	0.128028	0.403543	0.388759	0.354657	0.576909	0.590965	0.596141	0.610961	0.600964	0.620879	0.62984	0.626936	0.629255	0.615768	0.617987	0.629006	0.624588	0.626807	0.637826
150.5	0.10813	0.109226	0.116655	0.109103	0.113335	0.116293	0.122491	0.123963	0.127138	0.343232	0.326658	0.290685	0.570084	0.581306	0.586063	0.61548	0.604468	0.624627	0.632634	0.629082	0.634034	0.621133	0.619555	0.625219	0.629953	0.628375	0.634039
154	0.108071	0.109613	0.116766	0.109498	0.113031	0.115898	0.120938	0.12127	0.123905	0.310907	0.294486	0.261112	0.565844	0.573535	0.575776	0.619708	0.609084	0.62583	0.639454	0.634555	0.63816	0.62544	0.623778	0.632443	0.63426	0.632598	0.641263
164.5	0.10776	0.110033	0.11734	0.109032	0.112998	0.115262	0.119027	0.119144	0.123482	0.235901	0.22702	0.206173	0.546537	0.544177	0.548329	0.622941	0.611174	0.628588	0.644137	0.640152	0.644932	0.629363	0.628152	0.635793	0.638183	0.636972	0.644613
175	0.10767	0.109412	0.1172	0.108965	0.112951	0.115955	0.117943	0.118653	0.12223	0.198751	0.198055	0.183091	0.51515	0.503016	0.507104	0.626255	0.614183	0.630398	0.652209	0.649908	0.652589	0.638807	0.634662	0.643017	0.647627	0.643482	0.651837
185.5	0.107242	0.109031	0.117254	0.108672	0.11291	0.115832	0.117573	0.117896	0.121999	0.182634	0.183949	0.168452	0.478064	0.45719	0.451768	0.624576	0.614888	0.629745	0.655487	0.652856	0.65737	0.64248	0.640973	0.646675	0.6513	0.649793	0.655495
196	0.107191	0.108908	0.117532	0.108162	0.113636	0.115557	0.117334	0.117733	0.120683	0.171804	0.174879	0.159396	0.43467	0.403533	0.389807	0.623623	0.614532	0.629677	0.662105	0.658865	0.664229	0.649111	0.649611	0.653846	0.657931	0.658431	0.662666
206.5	0.106923	0.109059	0.117934	0.108325	0.111835	0.115348	0.117622	0.117792	0.119563	0.164089	0.166112	0.151338	0.386723	0.350613	0.337787	0.620403	0.615189	0.626316	0.667092	0.66295	0.668773	0.656879	0.656722	0.661598	0.665699	0.665542	0.670418
217	0.106909	0.109826	0.117924	0.107811	0.111112	0.115598	0.117825	0.118028	0.119676	0.156125	0.158663	0.145923	0.34493	0.305793	0.297226	0.616499	0.613269	0.621952	0.670718	0.667324	0.676176	0.659984	0.65921	0.666897	0.668804	0.66803	0.675717
227.5	0.107367	0.109249	0.118998	0.107803	0.112909	0.115644	0.118364	0.118634	0.119566	0.149961	0.152219	0.142372	0.310158	0.277779	0.270709	0.610429	0.610347	0.615939	0.675549	0.671822	0.682068	0.668362	0.668677	0.674642	0.677182	0.677497	0.683462
238	0.106909	0.108831	0.118113	0.107728	0.111529	0.116498	0.11871	0.118156	0.120044	0.144606	0.146667	0.139685	0.2867	0.264007	0.260799	0.602636	0.604094	0.607281	0.681895	0.67775	0.688106	0.67368	0.672305	0.681778	0.6825	0.681125	0.690598
248.5	0.106753	0.108801	0.117987	0.10789	0.112057	0.115745	0.11842	0.117718	0.120239	0.140248	0.142362	0.136477	0.275086	0.259749	0.259938	0.590218	0.594779	0.593946	0.68684	0.681255	0.693111	0.680645	0.680923	0.687951	0.689465	0.689743	0.696771
259	0.106747	0.109077	0.119552	0.107506	0.111657	0.115593	0.118215	0.11773	0.119777	0.1365	0.138374	0.135787	0.270551	0.2601	0.258672	0.572537	0.581791	0.577701	0.689917	0.687371	0.697326	0.687348	0.687166	0.695807	0.696168	0.695986	0.704627
269.5	0.107364	0.109162	0.12035	0.1077	0.111255	0.11611	0.118136	0.117493	0.119702	0.133913	0.13557	0.13502	0.270466	0.261477	0.254023	0.549235	0.561776	0.55417	0.694782	0.690127	0.702007	0.696718	0.696621	0.702609	0.705538	0.705441	0.711429

## Sheet: 2.5x10^7 cfu per ml
2.5x10^7 cfu/ml
time	5x10^8 pfu/ml			5x10^7 pfu/ml			5x10^6 pfu/ml			5x10^5 pfu/ml			5x10^4 pfu/ml			5x10^3 pfu/ml			5x10^2 pfu/ml			5x10^1 pfu/ml			0 pfu/ml
5.5	0.108869	0.123194	0.125476	0.127689	0.132014	0.134296	0.133316	0.134399	0.134603	0.132834	0.141264	0.138812	0.133126	0.136267	0.136832	0.139772	0.137526	0.138795	0.134422	0.136686	0.137526	0.134206	0.136887	0.136003	0.135867	0.136033	0.136929
11	0.11856	0.122522	0.125609	0.12738	0.131342	0.134429	0.133752	0.1356	0.134391	0.136022	0.142466	0.138546	0.13493	0.137502	0.139434	0.140425	0.138444	0.140685	0.136699	0.13792	0.139269	0.137799	0.138469	0.137296	0.138838	0.139264	0.138968
16.5	0.117523	0.121264	0.125312	0.126343	0.130084	0.134132	0.135504	0.137706	0.13668	0.139171	0.146623	0.142828	0.138596	0.141232	0.143663	0.143458	0.142579	0.143797	0.139867	0.141879	0.142326	0.140962	0.142043	0.140999	0.143488	0.144585	0.14209
22	0.108874	0.112574	0.117133	0.117694	0.121394	0.125953	0.13765	0.140284	0.13997	0.143604	0.150336	0.146707	0.142154	0.145662	0.149136	0.147178	0.147364	0.149002	0.145056	0.146803	0.148394	0.146742	0.147755	0.146078	0.151247	0.150138	0.149852
27.5	0.101387	0.104821	0.109542	0.110207	0.113641	0.118362	0.141016	0.142487	0.14115	0.149162	0.155981	0.151785	0.148201	0.15102	0.154835	0.155309	0.152513	0.153394	0.151456	0.152506	0.154565	0.154487	0.15376	0.152517	0.159384	0.157958	0.156358
33	0.096506	0.099618	0.105871	0.105326	0.108438	0.114691	0.142634	0.144537	0.142311	0.156426	0.16301	0.15886	0.156215	0.158574	0.163524	0.162061	0.160166	0.162655	0.159727	0.161094	0.163177	0.162445	0.162804	0.159977	0.170016	0.168503	0.16633
38.5	0.094016	0.097573	0.100641	0.102836	0.106393	0.109461	0.145104	0.147416	0.147401	0.164568	0.173195	0.167126	0.163765	0.167595	0.173036	0.170642	0.16912	0.169425	0.169311	0.170407	0.171786	0.172883	0.173008	0.169988	0.183331	0.181571	0.178447
44	0.094009	0.095852	0.100721	0.102829	0.104672	0.109541	0.149942	0.15143	0.152245	0.175271	0.183232	0.177501	0.174091	0.178059	0.183587	0.181238	0.180407	0.180828	0.18126	0.181488	0.183034	0.187051	0.185403	0.182861	0.199897	0.196846	0.193281
49.5	0.094078	0.095226	0.099843	0.102898	0.104046	0.108663	0.15541	0.158321	0.157899	0.188787	0.196817	0.189621	0.187842	0.192513	0.197022	0.195686	0.193489	0.193889	0.195873	0.195925	0.197286	0.203032	0.201173	0.198572	0.218878	0.215858	0.21037
55	0.095069	0.094852	0.099567	0.103889	0.103672	0.108387	0.163148	0.165125	0.164356	0.203257	0.212624	0.204145	0.202782	0.208582	0.214007	0.209663	0.207702	0.208045	0.212452	0.211133	0.214245	0.221044	0.21907	0.215422	0.239887	0.236228	0.229482
66	0.096763	0.095009	0.100433	0.105583	0.103829	0.109253	0.179201	0.179384	0.179756	0.2406	0.254868	0.245799	0.242733	0.253473	0.255452	0.249314	0.250005	0.248478	0.25592	0.255537	0.256857	0.267443	0.265616	0.260618	0.302403	0.290325	0.276991
71.5	0.095608	0.095086	0.099094	0.104428	0.103906	0.107914	0.182931	0.184315	0.184838	0.257604	0.273647	0.264769	0.263366	0.273427	0.277779	0.27047	0.271663	0.268948	0.28096	0.276029	0.278318	0.290275	0.28739	0.282613	0.330934	0.31811	0.302158
77	0.097703	0.094888	0.098939	0.106523	0.103708	0.107759	0.18618	0.187982	0.187807	0.272734	0.291841	0.280253	0.281634	0.292606	0.2957	0.290095	0.291016	0.287336	0.300215	0.295104	0.297846	0.311884	0.309243	0.30275	0.350862	0.340112	0.323562
92.5	0.09441	0.095459	0.098826	0.10323	0.104279	0.107646	0.187305	0.192401	0.190596	0.323322	0.343071	0.331875	0.343076	0.355108	0.361712	0.351431	0.359243	0.348438	0.364684	0.359474	0.360936	0.378561	0.376765	0.360972	0.414121	0.403926	0.38526
99	0.09441	0.095459	0.098826	0.10323	0.104279	0.107646	0.187305	0.192401	0.190596	0.323322	0.343071	0.331875	0.343076	0.355108	0.361712	0.351431	0.359243	0.348438	0.364684	0.359474	0.360936	0.378561	0.376765	0.360972	0.414121	0.403926	0.38526
105.5	0.095272	0.094779	0.099043	0.104092	0.103599	0.107863	0.181208	0.185262	0.18413	0.337392	0.359233	0.345365	0.365856	0.377649	0.384119	0.374719	0.381357	0.370372	0.386141	0.382628	0.384282	0.40111	0.401949	0.385444	0.436284	0.431311	0.412258
112	0.094334	0.09446	0.098657	0.103154	0.10328	0.107477	0.16801	0.172637	0.170416	0.345415	0.365587	0.354677	0.386615	0.402175	0.409293	0.397709	0.406452	0.395368	0.412342	0.404726	0.40681	0.427291	0.425836	0.409462	0.457092	0.453946	0.4356
118.5	0.094155	0.094073	0.0972	0.102975	0.102893	0.10602	0.150776	0.152619	0.151259	0.349717	0.367583	0.356784	0.409885	0.422363	0.430138	0.423108	0.430136	0.419144	0.43595	0.428366	0.432799	0.448672	0.44846	0.432128	0.477008	0.474101	0.457967
125	0.095386	0.093963	0.097459	0.104206	0.102783	0.106279	0.134715	0.135001	0.134793	0.345428	0.362508	0.354794	0.426027	0.439342	0.445692	0.444972	0.449271	0.439386	0.454758	0.447793	0.453164	0.466081	0.465209	0.450443	0.493743	0.493312	0.477803
131.5	0.093204	0.093578	0.097131	0.102024	0.102398	0.105951	0.123105	0.122441	0.122142	0.327889	0.340417	0.336674	0.432739	0.448689	0.453447	0.459176	0.465518	0.45674	0.472486	0.467217	0.469268	0.483773	0.484153	0.468692	0.511512	0.514495	0.496065
138	0.093942	0.093599	0.097378	0.102762	0.102419	0.106198	0.116669	0.115531	0.11548	0.291353	0.304635	0.298731	0.441439	0.456136	0.463573	0.477435	0.482784	0.474617	0.49124	0.487003	0.492125	0.501621	0.503672	0.486262	0.526158	0.529098	0.514547
144.5	0.09341	0.093201	0.096231	0.10223	0.102021	0.105051	0.112154	0.111686	0.112071	0.242512	0.255141	0.246863	0.441614	0.456976	0.464978	0.491956	0.50055	0.489662	0.508009	0.505146	0.509602	0.517686	0.519725	0.503726	0.5393	0.54337	0.527744
151	0.093282	0.092995	0.097274	0.102102	0.101815	0.106094	0.110619	0.109815	0.109719	0.193611	0.204458	0.198637	0.434182	0.449037	0.456835	0.503274	0.512066	0.500917	0.522609	0.518218	0.522513	0.531261	0.532023	0.52035	0.545301	0.552325	0.539383
157.5	0.093745	0.093129	0.096699	0.102565	0.101949	0.105519	0.109705	0.108606	0.10775	0.159958	0.166873	0.16497	0.417897	0.430028	0.438395	0.51222	0.518597	0.508156	0.533268	0.530295	0.534613	0.538984	0.543211	0.530384	0.551761	0.559164	0.547337
164	0.091959	0.092501	0.096277	0.100779	0.101321	0.105097	0.107897	0.107536	0.106691	0.140602	0.146195	0.145942	0.389879	0.402957	0.410533	0.514454	0.519851	0.510623	0.539171	0.53649	0.539601	0.545895	0.5489	0.53723	0.558746	0.565375	0.552396
180	0.092039	0.093085	0.095818	0.100859	0.101905	0.104638	0.105945	0.106772	0.106041	0.118452	0.122883	0.1222	0.260377	0.265359	0.269082	0.509431	0.517503	0.496301	0.554641	0.553812	0.553826	0.565069	0.566681	0.556196	0.574105	0.581864	0.564434
185.5	0.091745	0.092502	0.095246	0.100565	0.101322	0.104066	0.105837	0.106006	0.105355	0.116811	0.120699	0.119188	0.235505	0.242324	0.24505	0.497157	0.500916	0.484152	0.552249	0.554341	0.552268	0.56492	0.565262	0.55267	0.568385	0.577194	0.563962
191	0.09195	0.09264	0.095699	0.10077	0.10146	0.104519	0.105527	0.104827	0.104105	0.115244	0.119956	0.119428	0.220035	0.226347	0.228957	0.492943	0.497323	0.478949	0.552788	0.554981	0.553028	0.561916	0.565867	0.555817	0.572352	0.581721	0.565853
196.5	0.092799	0.091949	0.094941	0.101619	0.100769	0.103761	0.10546	0.104222	0.10362	0.114864	0.118029	0.118352	0.210027	0.214508	0.218248	0.488449	0.490725	0.472474	0.552689	0.556555	0.555163	0.567192	0.569549	0.559243	0.576656	0.58484	0.569192
202	0.091261	0.092026	0.095194	0.100081	0.100846	0.104014	0.104609	0.104894	0.103888	0.114177	0.118078	0.117313	0.20198	0.206304	0.209927	0.484566	0.486388	0.465377	0.551519	0.560485	0.556303	0.570685	0.575503	0.564183	0.580152	0.588615	0.573653
207.5	0.092062	0.092134	0.095214	0.100882	0.100954	0.104034	0.105024	0.103736	0.10426	0.113738	0.116863	0.116531	0.196321	0.200581	0.204322	0.476452	0.477993	0.455744	0.552865	0.5615	0.556163	0.574036	0.577628	0.56726	0.583528	0.592115	0.578483
213	0.091913	0.092142	0.095379	0.100733	0.100962	0.104199	0.103552	0.10368	0.103322	0.113241	0.117053	0.116493	0.192342	0.19636	0.200609	0.467107	0.466108	0.441284	0.553637	0.563528	0.556106	0.578663	0.577672	0.570128	0.588378	0.596893	0.582985
218.5	0.091853	0.092067	0.094407	0.100673	0.100887	0.103227	0.103421	0.104162	0.102883	0.113255	0.115862	0.115302	0.190245	0.192297	0.19738	0.453835	0.453234	0.427225	0.554456	0.567064	0.556972	0.582388	0.583321	0.574116	0.592645	0.600471	0.586329
224	0.091538	0.092276	0.095728	0.100358	0.101096	0.104548	0.103996	0.102988	0.102759	0.113622	0.116278	0.116283	0.18715	0.190717	0.195974	0.440226	0.437922	0.412081	0.55426	0.567861	0.557429	0.586713	0.586107	0.578494	0.596272	0.604089	0.58939
229.5	0.091728	0.092537	0.095553	0.100548	0.101357	0.104373	0.102777	0.103384	0.103576	0.112911	0.116178	0.115314	0.185562	0.189062	0.194198	0.427064	0.424	0.397044	0.553375	0.568432	0.555171	0.588044	0.589938	0.579778	0.599754	0.607127	0.591613

## Sheet: 10^7 cfu per ml
10^7 cfu/ml
time	5x10^8 pfu/ml			5x10^7 pfu/ml			5x10^6 pfu/ml			5x10^5 pfu/ml			5x10^4 pfu/ml			5x10^3 pfu/ml			5x10^2 pfu/ml			5x10^1 pfu/ml			0 pfu/ml
3.5	0.083252	0.094591	0.100085	0.102072	0.103411	0.108905	0.103977	0.106761	0.145076	0.103449	0.110902	0.109166	0.103347	0.104782	0.10692	0.104176	0.10733	0.110224	0.104209	0.106069	0.105281	0.102471	0.107248	0.102432	0.103828	0.105642	0.105512
14	0.092759	0.094129	0.09945	0.101579	0.102949	0.10827	0.103642	0.106485	0.142847	0.102771	0.111973	0.110211	0.102589	0.104673	0.110426	0.103893	0.107929	0.110997	0.103224	0.104781	0.105781	0.102607	0.107337	0.103146	0.104287	0.105798	0.106407
24.5	0.092922	0.094482	0.099602	0.101742	0.103302	0.108422	0.105432	0.108343	0.142071	0.104297	0.112931	0.11184	0.104263	0.106913	0.111699	0.105828	0.107939	0.115852	0.105345	0.107089	0.10846	0.104939	0.112456	0.106048	0.107836	0.109604	0.110693
31.5	0.0871675	0.092275	0.095029	0.0959875	0.101095	0.103849	0.117893	0.138805	0.135564	0.108468	0.129346	0.115239	0.108355	0.112088	0.117174	0.109252	0.115333	0.118802	0.109484	0.111658	0.114176	0.109566	0.1197	0.112086	0.115405	0.117048	0.116785
42	0.083443	0.0862095	0.092673	0.092263	0.0950295	0.101493	0.108887	0.114116	0.137105	0.112918	0.123971	0.121344	0.113148	0.117875	0.124651	0.114287	0.123335	0.128326	0.115031	0.118547	0.121401	0.114386	0.126177	0.118586	0.121647	0.126952	0.124859
52.5	0.0819197	0.0862163	0.094394	0.0907397	0.0950363	0.103214	0.110964	0.114871	0.138324	0.11974	0.134994	0.131129	0.121514	0.127372	0.135298	0.122639	0.132397	0.139011	0.124367	0.128033	0.132679	0.124999	0.135938	0.131632	0.134941	0.138548	0.14005
59.5	0.0831498	0.091738	0.095699	0.0919698	0.100558	0.104519	0.114309	0.144421	0.140459	0.128799	0.143853	0.141386	0.13172	0.13893	0.147432	0.132626	0.143187	0.15024	0.135161	0.139452	0.145849	0.134861	0.14866	0.142679	0.14941	0.153839	0.156374
70	0.0830336	0.091388	0.097664	0.0918536	0.100208	0.106484	0.117492	0.123612	0.143212	0.14029	0.158812	0.155522	0.144877	0.15565	0.164714	0.14577	0.160738	0.17097	0.15008	0.156067	0.163595	0.150305	0.165728	0.160995	0.169161	0.172651	0.17771
80.5	0.0832982	0.092153	0.097163	0.0921182	0.100973	0.105983	0.120284	0.127909	0.144072	0.156113	0.179154	0.176955	0.164541	0.177676	0.194415	0.16454	0.182481	0.199092	0.171649	0.179798	0.19122	0.173345	0.18825	0.188462	0.199104	0.2064	0.214179
94.5	0.0834722	0.093448	0.098159	0.0922922	0.102268	0.106979	0.120956	0.135782	0.141847	0.184383	0.210803	0.207266	0.202573	0.222973	0.24571	0.202765	0.226826	0.252481	0.213994	0.225856	0.243335	0.217488	0.23606	0.240541	0.254366	0.26018	0.270572
105	0.0843364	0.096262	0.100046	0.0931564	0.105082	0.108866	0.119073	0.126981	0.134427	0.202733	0.231132	0.223343	0.237878	0.261606	0.284364	0.23983	0.269919	0.293538	0.254441	0.267162	0.286025	0.258449	0.281675	0.284286	0.30031	0.309607	0.319985
115.5	0.0852439	0.095062	0.098775	0.0940639	0.103882	0.107595	0.112683	0.118714	0.124688	0.211143	0.23677	0.225914	0.273204	0.299385	0.315026	0.284972	0.315264	0.342915	0.298774	0.315701	0.337468	0.305693	0.332784	0.337423	0.349657	0.355657	0.360551
126	0.085088	0.096192	0.100235	0.093908	0.105012	0.109055	0.104412	0.114322	0.118732	0.205003	0.22982	0.210478	0.304199	0.323702	0.33507	0.328832	0.359637	0.383206	0.348661	0.362252	0.380147	0.35332	0.3777	0.37921	0.38654	0.39111	0.395879
133	0.0858069	0.095038	0.100953	0.0946269	0.103858	0.109773	0.103717	0.113444	0.117218	0.194428	0.211768	0.187252	0.315918	0.332504	0.336368	0.358184	0.384902	0.402788	0.376131	0.390043	0.403205	0.381259	0.404815	0.406356	0.409628	0.415556	0.421267
143.5	0.0873804	0.096115	0.101434	0.0962004	0.104935	0.110254	0.103315	0.113453	0.116236	0.157176	0.16565	0.14581	0.311148	0.31605	0.297924	0.384972	0.407281	0.41985	0.414962	0.425948	0.441739	0.421396	0.446093	0.446382	0.450638	0.455943	0.462897
150.5	0.0880604	0.098178	0.103529	0.0968804	0.106998	0.112349	0.102501	0.115216	0.114258	0.135774	0.14569	0.133182	0.289476	0.28665	0.253242	0.393939	0.415273	0.419407	0.442714	0.447687	0.462719	0.448612	0.470812	0.471203	0.477488	0.479255	0.485694
154	0.0852439	0.095062	0.098775	0.0976852	0.107927	0.11292	0.102401	0.114429	0.113029	0.128342	0.138213	0.129993	0.270513	0.26337	0.228063	0.393986	0.415239	0.41199	0.45452	0.460137	0.472023	0.464756	0.488183	0.487299	0.490185	0.493579	0.49811
164.5	0.085088	0.096192	0.100235	0.0991625	0.110165	0.115291	0.102327	0.114934	0.112275	0.118383	0.127639	0.12361	0.206003	0.198444	0.169596	0.388654	0.394887	0.346776	0.482356	0.476264	0.479344	0.500837	0.520066	0.515835	0.515857	0.519478	0.520564
175	0.0858069	0.095038	0.100953	0.101775	0.113521	0.117641	0.103639	0.118944	0.111839	0.11407	0.12283	0.119926	0.165305	0.165065	0.14573	0.326646	0.316217	0.254524	0.493261	0.465608	0.467538	0.527038	0.544006	0.531303	0.539407	0.536959	0.534432
185.5	0.0873804	0.096115	0.101434	0.103684	0.114658	0.122074	0.104754	0.120013	0.112175	0.11136	0.12073	0.118387	0.14866	0.149191	0.137796	0.24442	0.237604	0.20035	0.483669	0.429771	0.416976	0.53757	0.549257	0.527725	0.548093	0.547299	0.542655
196	0.0880604	0.098178	0.103529	0.10733	0.119176	0.126133	0.105766	0.121462	0.113677	0.110041	0.119273	0.117787	0.137553	0.142269	0.13288	0.195279	0.195597	0.177444	0.440125	0.348086	0.322682	0.529003	0.540229	0.512867	0.555247	0.553363	0.548606
206.5	0.0852439	0.095062	0.098775	0.112094	0.124254	0.131046	0.107041	0.123602	0.1149	0.109852	0.119042	0.117133	0.133079	0.14145	0.130075	0.171409	0.177154	0.164859	0.359268	0.271671	0.26665	0.499021	0.515168	0.489702	0.562014	0.560132	0.554471
217	0.085088	0.096192	0.100235	0.116256	0.12821	0.135464	0.110001	0.128655	0.115742	0.110289	0.12026	0.119253	0.130577	0.140034	0.129658	0.158588	0.165927	0.156377	0.300222	0.237656	0.243492	0.464877	0.487971	0.460077	0.569625	0.567966	0.559945
227.5	0.0858069	0.095038	0.100953	0.121718	0.131514	0.138884	0.111781	0.130707	0.116802	0.111477	0.120984	0.12098	0.131648	0.142871	0.130323	0.15182	0.158968	0.153694	0.266096	0.229083	0.236258	0.432668	0.457286	0.428268	0.576326	0.573426	0.566828
238	0.0873804	0.096115	0.101434	0.126836	0.137817	0.143468	0.114354	0.134817	0.119857	0.112902	0.123079	0.12406	0.134049	0.14559	0.132301	0.150403	0.156893	0.153186	0.250684	0.225279	0.234578	0.393126	0.420574	0.396093	0.587815	0.584487	0.575482
248.5	0.0880604	0.098178	0.103529	0.132899	0.143535	0.148624	0.11751	0.140453	0.12149	0.115521	0.1268	0.126352	0.136905	0.149276	0.135452	0.150401	0.157231	0.153905	0.243824	0.225715	0.237973	0.355586	0.387067	0.365857	0.596659	0.592204	0.582142
259	0.0852439	0.095062	0.098775	0.138931	0.149055	0.151453	0.118865	0.144307	0.122369	0.118054	0.130927	0.13052	0.138548	0.153154	0.137295	0.150636	0.157554	0.154486	0.244989	0.226939	0.240575	0.325808	0.349621	0.332912	0.606387	0.602128	0.58999
269.5	0.085088	0.096192	0.100235	0.144491	0.153705	0.156583	0.119473	0.145841	0.124511	0.121625	0.134992	0.135945	0.142953	0.15846	0.14312	0.154688	0.161476	0.158033	0.24588	0.228532	0.242709	0.292646	0.311742	0.300711	0.612945	0.607905	0.594901

## Sheet: 5x10^6 cfu per ml
5x10^6 cfu/ml
time	5x10^8 pfu/ml			5x10^7 pfu/ml			5x10^6 pfu/ml			5x10^5 pfu/ml			5x10^4 pfu/ml			5x10^3 pfu/ml			5x10^2 pfu/ml			5x10^1 pfu/ml			0 pfu/ml
3.5	0.0772091	0.0903151	0.0868293	0.0960291	0.0991351	0.0956493	0.0982366	0.106242	0.0984366	0.0961438	0.10125	0.100498	0.100153	0.105476	0.0997625	0.111476	0.110917	0.0996745	0.0964893	0.111157	0.101693	0.10559	0.118507	0.0968748	0.124944	0.122224	0.104163
14	0.0876239	0.0906677	0.0871672	0.0964439	0.0994877	0.0959872	0.0982446	0.106181	0.0992344	0.0961474	0.101779	0.100679	0.101964	0.10601	0.100229	0.112008	0.111506	0.101094	0.0967366	0.113822	0.104115	0.103773	0.120644	0.0970505	0.118092	0.11889	0.106576
24.5	0.0887707	0.093294	0.0878624	0.0975907	0.102114	0.0966824	0.0992655	0.109362	0.101137	0.0976633	0.103231	0.102554	0.102978	0.107654	0.102366	0.112786	0.113438	0.102984	0.0982883	0.114964	0.107506	0.107034	0.121992	0.0992577	0.124562	0.1243	0.109518
31.5	0.0900996	0.095921	0.0894207	0.0989196	0.104741	0.0982407	0.102037	0.115686	0.104562	0.100869	0.110115	0.105673	0.108987	0.116	0.105792	0.122032	0.120766	0.109651	0.101754	0.122371	0.111603	0.11869	0.12869	0.103356	0.132989	0.134866	0.111795
42	0.0886117	0.095642	0.0871702	0.0974317	0.104462	0.0959902	0.103171	0.117504	0.106654	0.104233	0.114771	0.109517	0.113478	0.122288	0.110601	0.13017	0.127086	0.113821	0.104952	0.129227	0.114987	0.119152	0.134399	0.10882	0.128622	0.13415	0.118485
52.5	0.0851659	0.092626	0.084794	0.0939859	0.101446	0.093614	0.103179	0.118264	0.105667	0.108776	0.119533	0.115295	0.118878	0.125903	0.11781	0.133493	0.134464	0.11985	0.111306	0.135258	0.123053	0.128918	0.139546	0.11543	0.140317	0.143328	0.126891
59.5	0.0845576	0.092595	0.0855857	0.0933776	0.101415	0.0944057	0.104897	0.118568	0.105732	0.116252	0.12527	0.122448	0.131433	0.133019	0.125308	0.143051	0.138279	0.128066	0.118617	0.136914	0.131367	0.134271	0.146963	0.125099	0.151418	0.146718	0.135959
70	0.0837138	0.092158	0.0860592	0.0925338	0.100978	0.0948792	0.103777	0.117475	0.106674	0.120589	0.132043	0.128327	0.134859	0.143404	0.136517	0.142924	0.145623	0.140009	0.127498	0.148614	0.140693	0.142346	0.159264	0.136254	0.150401	0.156539	0.150635
80.5	0.0830275	0.092762	0.0864544	0.0918475	0.101582	0.0952744	0.104154	0.118577	0.104743	0.127206	0.137889	0.133882	0.150794	0.156775	0.151472	0.160291	0.165039	0.156446	0.141147	0.162523	0.160371	0.158618	0.171457	0.156569	0.174293	0.175651	0.171846
94.5	0.0823441	0.092307	0.0860681	0.0911641	0.101127	0.0948881	0.100169	0.109589	0.10097	0.130454	0.141092	0.134806	0.170837	0.173645	0.172392	0.189945	0.187227	0.188029	0.169306	0.192848	0.193573	0.190223	0.205233	0.192045	0.205256	0.210675	0.21402
105	0.0830168	0.093201	0.0866865	0.0918368	0.102021	0.0955065	0.0970783	0.105092	0.0991034	0.128302	0.13603	0.136272	0.178546	0.183636	0.183881	0.209846	0.214101	0.219276	0.196395	0.218811	0.230124	0.217269	0.233084	0.229531	0.24206	0.247137	0.256864
115.5	0.0832468	0.09238	0.0866042	0.0920668	0.1012	0.0954242	0.0956935	0.103306	0.0974844	0.127694	0.133436	0.131497	0.187143	0.19098	0.190761	0.234291	0.239238	0.242438	0.230683	0.253018	0.267023	0.253807	0.274711	0.267453	0.27754	0.28593	0.299047
126	0.0836246	0.094082	0.0869846	0.0924446	0.102902	0.0958046	0.0954521	0.104093	0.0979831	0.122848	0.126026	0.122939	0.185258	0.185073	0.185695	0.248986	0.252888	0.253215	0.263902	0.282008	0.29657	0.296806	0.314245	0.31616	0.325044	0.335171	0.350153
129.5	0.0830242	0.093103	0.0869665	0.0918442	0.101923	0.0957865	0.0948557	0.10361	0.0968403	0.118937	0.123298	0.119286	0.181031	0.179084	0.17762	0.247436	0.257254	0.26181	0.281269	0.302181	0.310344	0.328775	0.346107	0.34276	0.358185	0.366145	0.373898
143.5	0.0831967	0.092275	0.0883913	0.0920167	0.101095	0.0972113	0.0944842	0.103685	0.0964976	0.108645	0.11491	0.112738	0.163063	0.159953	0.148019	0.247472	0.257165	0.262035	0.295371	0.311079	0.320934	0.360357	0.377066	0.371918	0.387704	0.396601	0.410143
150.5	0.0836231	0.093475	0.0876362	0.0924431	0.102295	0.0964562	0.0945993	0.102944	0.0954438	0.105472	0.112326	0.109754	0.146854	0.141415	0.127559	0.247344	0.253281	0.247432	0.305099	0.31708	0.321561	0.37639	0.39086	0.384184	0.411826	0.42388	0.439425
154	0.0834767	0.09302	0.0881624	0.0922967	0.10184	0.0969824	0.0941472	0.103558	0.095742	0.103651	0.110536	0.109505	0.137318	0.134497	0.120815	0.238684	0.245796	0.235682	0.30527	0.314233	0.317217	0.379184	0.396656	0.389395	0.421525	0.434834	0.45167
164.5	0.083327	0.091989	0.0875906	0.092147	0.100809	0.0964106	0.092669	0.10252	0.0961713	0.0995882	0.105702	0.106205	0.117185	0.116162	0.111101	0.204344	0.212256	0.179998	0.291798	0.296409	0.277079	0.382158	0.40562	0.399912	0.46254	0.47422	0.491094
175	0.0841428	0.09395	0.0891438	0.0929628	0.10277	0.0979638	0.093503	0.102639	0.0951951	0.0972165	0.104653	0.104058	0.107609	0.110252	0.108738	0.16921	0.168757	0.131705	0.256908	0.259359	0.227813	0.380723	0.396639	0.372355	0.497612	0.508335	0.522477
185.5	0.0841382	0.094081	0.0888924	0.0929582	0.102901	0.0977124	0.0943551	0.104354	0.0957752	0.0952147	0.103199	0.103212	0.104522	0.10804	0.107955	0.134991	0.131243	0.115422	0.21315	0.216422	0.189043	0.329196	0.335207	0.285421	0.525823	0.534894	0.548663
196	0.0838344	0.092808	0.0891019	0.0926544	0.101628	0.0979219	0.0932925	0.10419	0.0953469	0.0936669	0.10204	0.102385	0.102628	0.108565	0.108987	0.121724	0.120829	0.112475	0.177159	0.183109	0.164942	0.259219	0.269058	0.215618	0.546801	0.554699	0.558517
206.5	0.0845181	0.093266	0.0902573	0.0933381	0.102086	0.0990773	0.0940315	0.103684	0.0959899	0.0932039	0.101099	0.101995	0.101808	0.106861	0.10747	0.117622	0.116633	0.112104	0.148696	0.158004	0.144665	0.217388	0.227277	0.183547	0.558798	0.565116	0.56855
217	0.0855151	0.095191	0.089222	0.0943351	0.104011	0.098042	0.0939845	0.103833	0.0949127	0.0927562	0.0995168	0.101024	0.102121	0.104933	0.106341	0.11535	0.113208	0.111571	0.129097	0.140873	0.133815	0.187247	0.197322	0.160832	0.569675	0.573763	0.580371
227.5	0.0835123	0.093922	0.0887859	0.0923323	0.102742	0.0976059	0.0930217	0.104007	0.0962562	0.0922465	0.0987138	0.101005	0.0991659	0.105028	0.104677	0.111658	0.114229	0.111979	0.121438	0.136107	0.129739	0.158188	0.169314	0.144021	0.578069	0.582493	0.586413
238	0.0848154	0.094411	0.091779	0.0936354	0.103231	0.100599	0.0931673	0.104185	0.0959136	0.0925698	0.0985435	0.101738	0.0991084	0.105471	0.106083	0.112526	0.114995	0.112182	0.117658	0.132579	0.127486	0.14291	0.156229	0.137386	0.585764	0.589522	0.594075
248.5	0.0845502	0.093175	0.0895554	0.0933702	0.101995	0.0983754	0.0940769	0.105729	0.0958854	0.0920055	0.0999259	0.102287	0.0990034	0.105635	0.106534	0.112233	0.116402	0.114412	0.116542	0.130189	0.12172	0.135658	0.149548	0.132214	0.594561	0.596709	0.601206
259	0.084677	0.095007	0.0901063	0.093497	0.103827	0.0989263	0.0929551	0.105409	0.0963503	0.0927502	0.100853	0.100832	0.100006	0.104876	0.105685	0.11222	0.116953	0.111769	0.113173	0.126097	0.119184	0.132799	0.145521	0.131162	0.602392	0.60865	0.611979
269.5	0.0854251	0.095126	0.091288	0.0942451	0.103946	0.100108	0.0928097	0.105297	0.0959302	0.0917989	0.0985178	0.100529	0.100271	0.106582	0.106838	0.111261	0.115477	0.111978	0.111599	0.124704	0.118665	0.130908	0.142562	0.127573	0.609673	0.615341	0.618294

## Sheet: 10^6 cfu per ml
10^6 cfu/ml
time	5x10^8 pfu/ml			5x10^7 pfu/ml			5x10^6 pfu/ml			5x10^5 pfu/ml			5x10^4 pfu/ml			5x10^3 pfu/ml			5x10^2 pfu/ml			5x10^1 pfu/ml			0 pfu/ml
70	0.0707671	0.081958	0.0887086	0.0895871	0.090778	0.0975286	0.0930247	0.0912433	0.0948813	0.113887	0.124269	0.101919	0.101338	0.114235	0.104069	0.100572	0.0996043	0.106903	0.105208	0.102008	0.116511	0.101242	0.108046	0.104882	0.105422	0.113512	0.131404
120.5	0.0823904	0.0826849	0.0897319	0.0912104	0.0915049	0.0985519	0.101845	0.101526	0.0947038	0.121401	0.129059	0.113633	0.137142	0.145577	0.135113	0.144001	0.139353	0.146689	0.146218	0.144139	0.159549	0.139452	0.144583	0.149892	0.146756	0.150362	0.172819
131	0.082414	0.0828332	0.0887501	0.091234	0.0916532	0.0975701	0.0906078	0.0912216	0.0944884	0.107543	0.109897	0.111338	0.141242	0.145314	0.143061	0.151921	0.144999	0.158491	0.152415	0.156022	0.174151	0.158241	0.158346	0.170056	0.165956	0.169029	0.192367
141.5	0.0819609	0.0826445	0.0883524	0.0907809	0.0914645	0.0971724	0.0906412	0.0904301	0.0953111	0.103613	0.10527	0.106528	0.144077	0.149595	0.144018	0.168458	0.162442	0.176246	0.172934	0.17808	0.198593	0.181897	0.180947	0.19816	0.194252	0.194243	0.222517
155.5	0.0826902	0.0828724	0.0884118	0.0915102	0.0916924	0.0972318	0.0907016	0.0910417	0.0946537	0.0960378	0.0970902	0.0991479	0.142811	0.145632	0.140347	0.184535	0.177137	0.185882	0.208997	0.213446	0.23846	0.226305	0.222758	0.247027	0.246943	0.242674	0.271381
166	0.0820007	0.0827495	0.0907658	0.0908207	0.0915695	0.0995858	0.090296	0.0907197	0.0956606	0.0922111	0.0933008	0.0961797	0.127862	0.127781	0.122634	0.188768	0.180577	0.190779	0.239733	0.237935	0.259175	0.259111	0.256569	0.287464	0.289015	0.28365	0.314627
176.5	0.0818916	0.082868	0.0909945	0.0907116	0.091688	0.0998145	0.090112	0.0901838	0.0973752	0.0910322	0.0921909	0.0948088	0.110383	0.109222	0.10671	0.182919	0.175649	0.183068	0.259926	0.249242	0.268179	0.287545	0.289653	0.323388	0.335145	0.325706	0.359621
187	0.081961	0.08309	0.091485	0.090781	0.09191	0.100305	0.090689	0.0904563	0.0946636	0.0909671	0.091755	0.0939729	0.0990484	0.0995931	0.100101	0.163627	0.158437	0.157994	0.268872	0.255184	0.270712	0.304439	0.31204	0.347794	0.370008	0.360553	0.394397
194	0.082257	0.0829241	0.09144	0.091077	0.0917441	0.10026	0.0906537	0.0907041	0.0965008	0.0906879	0.0917274	0.094114	0.0962111	0.0968833	0.0983673	0.147166	0.141557	0.137015	0.270695	0.252572	0.261142	0.306806	0.318847	0.356652	0.393022	0.380398	0.418869
204.5	0.0820088	0.0827987	0.091194	0.0908288	0.0916187	0.100014	0.0903583	0.0904336	0.0938115	0.0905588	0.0918562	0.0935973	0.0937324	0.0967359	0.0969783	0.118324	0.116064	0.112508	0.25663	0.226958	0.222349	0.291683	0.32284	0.355801	0.432118	0.420421	0.454
211.5	0.0823522	0.0831103	0.092574	0.0911722	0.0919303	0.101394	0.0899708	0.0901254	0.0953148	0.0901341	0.0915282	0.0932923	0.0937572	0.0954443	0.096873	0.105505	0.104448	0.107753	0.232984	0.203563	0.197449	0.271047	0.318582	0.334933	0.459747	0.449454	0.485174
215	0.0825599	0.0829618	0.092719	0.0913799	0.0917818	0.101539	0.0900665	0.0906629	0.0958719	0.0904448	0.0913394	0.0933299	0.0940325	0.0956924	0.096989	0.101516	0.100571	0.107813	0.219302	0.191358	0.186837	0.255506	0.310959	0.311324	0.473011	0.461466	0.495273
225.5	0.0826406	0.0831361	0.09239	0.0914606	0.0919561	0.10121	0.0907688	0.0903837	0.0970431	0.090859	0.0912871	0.0933039	0.094102	0.095774	0.0959302	0.0978921	0.0973492	0.107823	0.191372	0.162991	0.161262	0.217715	0.269531	0.250494	0.508785	0.497689	0.533991
236	0.0821444	0.0831821	0.095186	0.0909644	0.0920021	0.104006	0.0906861	0.0910601	0.0959505	0.0910976	0.0913469	0.0931033	0.0942104	0.0956013	0.0958342	0.09722	0.0974349	0.104326	0.171512	0.140874	0.138223	0.192993	0.234843	0.216232	0.537903	0.524282	0.558052
246.5	0.082346	0.083412	0.094552	0.091166	0.092232	0.103372	0.0908987	0.0911091	0.0942204	0.090385	0.0915814	0.0931317	0.0932908	0.0958394	0.0967967	0.0973884	0.0977017	0.10313	0.15405	0.125197	0.129815	0.172126	0.211298	0.192147	0.55736	0.540326	0.575266
257	0.0828339	0.0832732	0.094779	0.0916539	0.0920932	0.103599	0.090289	0.0904138	0.094267	0.0899647	0.0916105	0.0930024	0.0934971	0.0956034	0.0971123	0.0972698	0.0981002	0.102495	0.13779	0.119125	0.126875	0.154734	0.188654	0.172034	0.5688	0.552341	0.585637
267.5	0.0823978	0.0832692	0.095545	0.0912178	0.0920892	0.104365	0.0913441	0.0911733	0.0958056	0.0910218	0.0911626	0.092508	0.0938982	0.0956972	0.0957377	0.0975858	0.0975171	0.104975	0.125467	0.115002	0.120378	0.138964	0.167966	0.154834	0.574817	0.562215	0.596903
278	0.0828606	0.0834967	0.094921	0.0916806	0.0923167	0.103741	0.0905521	0.0905776	0.0965368	0.0904775	0.0915466	0.0931398	0.0938669	0.0964995	0.0969816	0.0977897	0.0984567	0.10329	0.120375	0.115177	0.121305	0.130533	0.154153	0.14716	0.58259	0.567728	0.604786
288.5	0.0830418	0.083457	0.098049	0.0918618	0.092277	0.106869	0.0907109	0.0910974	0.0961841	0.0915749	0.0911585	0.0931449	0.0940175	0.0963225	0.0964064	0.097905	0.0989102	0.105633	0.11893	0.113479	0.118816	0.126014	0.146471	0.140396	0.593635	0.574044	0.614212

## Sheet: 5x10^5 cfu per ml
5x10^5 cfu/ml
time	5x10^8 pfu/ml			5x10^7 pfu/ml			5x10^6 pfu/ml			5x10^5 pfu/ml			5x10^4 pfu/ml			5x10^3 pfu/ml			5x10^2 pfu/ml			5x10^1 pfu/ml			0 pfu/ml
100	0.0989113	0.10034	0.102085	0.0989113	0.10034	0.102085	0.0989113	0.10034	0.102085	0.113887	0.124269	0.101919	0.101338	0.114235	0.104069	0.100572	0.0996043	0.106903	0.105208	0.102008	0.116511	0.101242	0.108046	0.104882	0.105422	0.113512	0.131404
130
156	0.0987233	0.1035	0.102191	0.0987233	0.1035	0.102191	0.0987233	0.1035	0.102191	0.0987233	0.1035	0.102191	0.113225	0.113423	0.112994	0.137102	0.116543	0.118976	0.133958	0.138081	0.141882	0.126129	0.124088	0.121997	0.133667	0.131283	0.134258
159	0.099131	0.101123	0.0997801	0.099131	0.101123	0.0997801	0.099131	0.101123	0.0997801	0.099131	0.101123	0.0997801	0.115116	0.113368	0.110863	0.134315	0.129224	0.122227	0.133963	0.138371	0.140965	0.124579	0.123654	0.124221	0.133448	0.132254	0.134182
162	0.0992618	0.101884	0.101809	0.0992618	0.101884	0.101809	0.0992618	0.101884	0.101809	0.0992618	0.101884	0.101809	0.112936	0.110783	0.111131	0.134623	0.139099	0.14186	0.133963	0.138371	0.140965	0.123387	0.12339	0.124242	0.134221	0.133915	0.135303
165	0.0988983	0.101486	0.102114	0.0988983	0.101486	0.102114	0.0988983	0.101486	0.102114	0.0988983	0.101486	0.102114	0.111183	0.110081	0.110564	0.135886	0.139367	0.142294	0.133958	0.138081	0.131882	0.118238	0.120703	0.115607	0.135546	0.135219	0.137589
168	0.0970651	0.100699	0.10073	0.0970651	0.100699	0.10073	0.0970651	0.100699	0.10073	0.0970651	0.100699	0.10073	0.109622	0.10979	0.108101	0.133958	0.138081	0.141882	0.141563	0.143068	0.135099	0.121653	0.126431	0.12097	0.137981	0.138729	0.141196
171	0.0989113	0.10034	0.102085	0.0989113	0.10034	0.102085	0.0989113	0.10034	0.102085	0.0989113	0.10034	0.102085	0.111129	0.109088	0.106997	0.133963	0.138371	0.140965	0.143131	0.155023	0.167008	0.126183	0.125081	0.125564	0.140586	0.140671	0.143428
174	0.0988983	0.101486	0.102114	0.0988983	0.101486	0.102114	0.0988983	0.101486	0.102114	0.0988983	0.101486	0.102114	0.109579	0.108654	0.109221	0.133963	0.138371	0.140965	0.141563	0.143068	0.16499	0.135783	0.135022	0.133476	0.144694	0.145298	0.148881
177	0.0987233	0.1035	0.102191	0.0987233	0.1035	0.102191	0.0987233	0.1035	0.102191	0.0987233	0.1035	0.102191	0.113225	0.113423	0.112994	0.133958	0.138081	0.131882	0.145774	0.156997	0.173934	0.136125	0.139066	0.138736	0.148587	0.149334	0.150931
180	0.099131	0.101123	0.0997801	0.099131	0.101123	0.0997801	0.099131	0.101123	0.0997801	0.099131	0.101123	0.0997801	0.115116	0.113368	0.110863	0.134315	0.149224	0.122227	0.14761	0.159381	0.176801	0.135601	0.131311	0.131319	0.152688	0.153603	0.155627
183	0.0992618	0.101884	0.101809	0.0992618	0.101884	0.101809	0.0992618	0.101884	0.101809	0.0992618	0.101884	0.101809	0.112936	0.110783	0.111131	0.134623	0.139099	0.14186	0.150134	0.162561	0.178647	0.13623	0.136702	0.137336	0.163688	0.163643	0.164827
186	0.0989113	0.10034	0.102085	0.0988983	0.101486	0.102114	0.0988983	0.101486	0.102114	0.0988983	0.101486	0.102114	0.111183	0.110081	0.110564	0.135886	0.139367	0.142294	0.152875	0.165144	0.180465	0.138539	0.144033	0.148305	0.170913	0.167714	0.176874
189	0.0988983	0.101486	0.102114	0.0970651	0.100699	0.10073	0.0970651	0.100699	0.10073	0.0970651	0.100699	0.10073	0.109622	0.10979	0.108101	0.133958	0.138081	0.141882	0.157825	0.169846	0.186662	0.152606	0.157087	0.158215	0.173874	0.174287	0.18377
192	0.0987233	0.1035	0.102191	0.0988983	0.101486	0.102114	0.0989113	0.10034	0.102085	0.0989113	0.10034	0.102085	0.111129	0.109088	0.106997	0.133963	0.138371	0.140965	0.161127	0.17498	0.190257	0.154754	0.162067	0.169847	0.184158	0.181554	0.19382
195	0.099131	0.101123	0.0997801	0.0987233	0.1035	0.102191	0.0988983	0.101486	0.102114	0.09771	0.0990743	0.101662	0.109579	0.108654	0.109221	0.13427	0.137951	0.139655	0.165073	0.179851	0.195712	0.16329	0.173126	0.180729	0.189813	0.190175	0.199865
198	0.0992618	0.101884	0.101809	0.099131	0.101123	0.0997801	0.0987233	0.1035	0.102191	0.0992714	0.100057	0.101559	0.108387	0.10839	0.109242	0.134536	0.138637	0.141354	0.170093	0.184601	0.198145	0.182191	0.182474	0.198159	0.200153	0.199463	0.21262
201	0.0988983	0.101486	0.102114	0.0992618	0.101884	0.101809	0.099131	0.101123	0.0997801	0.0966033	0.0984915	0.101779	0.106496	0.107955	0.106371	0.133143	0.139483	0.141814	0,210223*	0,232359*	0,221648*	0.197165	0.205914	0.212904	0.21371	0.212502	0.225215
204	0.0970651	0.100699	0.10073	0.0988983	0.101486	0.102114	0.0992618	0.101884	0.101809	0.100742	0.100642	0.102167	0.10962	0.108063	0.106	0.13402	0.137442	0.140339	0.183301	0.201757	0.210726	0.204886	0.217313	0.226984	0.223297	0.224161	0.238671
207	0.0989113	0.10034	0.102085	0.0970651	0.100699	0.10073	0.0988983	0.101486	0.102114	0.0976711	0.0981682	0.102205	0.106977	0.106818	0.107009	0.134445	0.137678	0.139733	0.186052	0.204199	0.212997	0.214062	0.230654	0.2435	0.236321	0.234471	0.25108
210	0.0988983	0.101486	0.102114	0.0987233	0.1035	0.102191	0.0970651	0.100699	0.10073	0.096694	0.0972659	0.101216	0.106178	0.106278	0.105527	0.133926	0.136892	0.140128	0.188254	0.207416	0.214767	0.22801	0.245728	0.260979	0,268557*	0,288667*	0,278299*
213	0.0987233	0.1035	0.102191	0.099131	0.101123	0.0997801	0.0989113	0.10034	0.102085	0.0964504	0.09984	0.101878	0.1045	0.105887	0.105567	0.13358	0.137215	0.141102	0.188647	0.208582	0.216806	0.24269	0.260248	0.276948	0.272005	0.273491	0.28893
216	0.0989113	0.10034	0.102085	0.0992618	0.101884	0.101809	0.0988983	0.101486	0.102114	0.0989164	0.0973171	0.102148	0.105726	0.10626	0.10615	0.133479	0.136843	0.139276	0.190872	0.211329	0.218742	0.255715	0.274291	0.271331	0.286504	0.288704	0.305099
219	0.0988983	0.101486	0.102114	0.0988983	0.101486	0.102114	0.0987233	0.1035	0.102191	0.0979004	0.0981401	0.103046	0,159664*	0,190347*	0,207257*	0,183463*	0,281213*	0,276746*	0,315297*	0,314548*	0,247095*	0,389294*	0,371081*	0,315201*	0,306027*	0,305605*	0,305054*
223	0.0987233	0.1035	0.102191	0.0970651	0.100699	0.10073	0.099131	0.101123	0.0997801	0.104818	0.0969587	0.0977086	0.10689	0.104669	0.0983836	0.125143	0.127812	0.133655	0.195597	0.194567	0.201945	0.282494	0.285241	0.266171	0.323049	0.313979	0.322112
226	0.099131	0.101123	0.0997801	0.0989113	0.10034	0.102085	0.0989113	0.10034	0.102085	0.107349	0.0965014	0.0957296	0.106823	0.103381	0.0975646	0.123055	0.123501	0.130076	0.182191	0.182474	0.198159	0.289575	0.294513	0.254677	0.333878	0.325874	0.334021
229	0.0992618	0.101884	0.101809	0.0988983	0.101486	0.102114	0.0988983	0.101486	0.102114	0.105197	0.0963036	0.0973224	0.106047	0.104517	0.0972637	0.119776	0.121983	0.129281	0.169387	0.170836	0.188021	0.289715	0.29655	0.246705	0.341743	0.339334	0.345155
232	0.0988983	0.101486	0.102114	0.0987233	0.1035	0.102191	0.0987233	0.1035	0.102191	0.104232	0.0969096	0.0960639	0.104733	0.106475	0.09682	0.116397	0.124815	0.125271	0.157905	0.162191	0.175322	0.285961	0.294095	0.234837	0.351767	0.346646	0.354752
235	0.0970651	0.100699	0.10073	0.099131	0.101123	0.0997801	0.099131	0.101123	0.0997801	0.102632	0.0980445	0.0971686	0.104224	0.106351	0.0961851	0.113657	0.121425	0.123193	0.147291	0.154332	0.16385	0.281011	0.295152	0.218688	0.364693	0.359819	0.366999
238	0.0989113	0.10034	0.102085	0.0992618	0.101884	0.101809	0.0992618	0.101884	0.101809	0.105575	0.0977675	0.0978259	0.104796	0.10615	0.0964905	0.110884	0.118359	0.122417	0.139176	0.145278	0.153902	0.27319	0.289524	0.201803	0.374996	0.367045	0.377706
241	0.0988983	0.101486	0.102114	0.0988983	0.101486	0.102114	0.0988983	0.101486	0.102114	0.105004	0.0990482	0.0974959	0.105168	0.104761	0.0975638	0.109636	0.112071	0.120646	0.132777	0.138334	0.147805	0.260813	0.278032	0.187813	0.385597	0.380761	0.386347
244	0.0989113	0.10034	0.102085	0.0970651	0.100699	0.10073	0.0970651	0.100699	0.10073	0.106495	0.101562	0.0973975	0.104346	0.107274	0.097171	0.107102	0.116543	0.118976	0.12833	0.134488	0.142645	0.243264	0.266929	0.175683	0.397457	0.389835	0.398064
247	0.0988983	0.101486	0.102114	0.099131	0.101123	0.0997801	0.0989113	0.10034	0.102085	0.109738	0.099325	0.096967	0.103622	0.105047	0.0964087	0.10513	0.11166	0.117553	0.124175	0.129596	0.137435	0.222772	0.244676	0.167032	0.407082	0.399704	0.406297
250	0.0987233	0.1035	0.102191	0.0992618	0.101884	0.101809	0.0988983	0.101486	0.102114	0.106233	0.0985497	0.0963523	0.103959	0.103734	0.0955328	0.10463	0.108515	0.115318	0.121225	0.12573	0.133797	0.206533	0.225544	0.162758	0.417032	0.410299	0.419042
253	0.099131	0.101123	0.0997801	0.0988983	0.101486	0.102114	0.0987233	0.1035	0.102191	0.109829	0.0991062	0.0968077	0.103798	0.103529	0.0962111	0.103293	0.106717	0.115797	0.11877	0.122421	0.131391	0.195133	0.211259	0.15737	0.428486	0.421127	0.429795
256	0.0992618	0.101884	0.101809	0.0970651	0.100699	0.10073	0.099131	0.101123	0.0997801	0.104482	0.0996452	0.09718	0.102969	0.104557	0.0963371	0.102699	0.10992	0.115891	0.116672	0.120322	0.129695	0.188139	0.20298	0.152933	0.436712	0.428133	0.437375
259	0.0988983	0.101486	0.102114	0.0989113	0.10034	0.102085	0.0992618	0.101884	0.101809	0.106653	0.0995082	0.0988443	0.10302	0.106367	0.0974995	0.102086	0.109564	0.115547	0.11492	0.11812	0.127987	0.183866	0.197584	0.150037	0.448144	0.438795	0.448379
262	0.0970651	0.100699	0.10073	0.0988983	0.101486	0.102114	0.0989113	0.10034	0.102085	0.105243	0.100498	0.0967534	0.104024	0.104583	0.0963093	0.102146	0.107209	0.116553	0.113283	0.115606	0.125196	0.181115	0.194358	0.145338	0.457117	0.449066	0.457192
265	0.0989113	0.10034	0.102085	0.0987233	0.1035	0.102191	0.0988983	0.101486	0.102114	0.106527	0.0992834	0.0966625	0.10351	0.105181	0.0971322	0.10225	0.109778	0.116397	0.111964	0.114549	0.12444	0.178533	0.191965	0.142964	0.464377	0.455887	0.464055
268	0.0988983	0.101486	0.102114	0.099131	0.101123	0.0997801	0.0987233	0.1035	0.102191	0.112728	0.100281	0.0967432	0.102682	0.106581	0.0963708	0.101989	0.109605	0.116504	0.110788	0.113181	0.122898	0.176188	0.191048	0.141415	0.472592	0.463687	0.473121
271	0.0987233	0.1035	0.102191	0.0992618	0.101884	0.101809	0.099131	0.101123	0.0997801	0.109169	0.101358	0.0987911	0.103135	0.107504	0.0966147	0.101622	0.110948	0.116989	0.109792	0.111722	0.12253	0.174254	0.189905	0.137872	0.481842	0.471821	0.47954
274	0.099131	0.101123	0.0997801	0.0988983	0.101486	0.102114	0.0992618	0.101884	0.101809	0.110005	0.102456	0.096728	0.103872	0.105454	0.0964258	0.101982	0.107294	0.116434	0.108483	0.110405	0.121298	0.172015	0.186823	0.136099	0.486331	0.478172	0.486188
277	0.0992618	0.101884	0.101809	0.0970651	0.100699	0.10073	0.0988983	0.101486	0.102114	0.109802	0.100993	0.0984146	0.104414	0.105914	0.0977587	0.101875	0.110113	0.117546	0.107763	0.111264	0.119714	0.170036	0.18672	0.134676	0.493596	0.485912	0.493961
280	0.0989113	0.10034	0.102085	0.0992618	0.101884	0.101809	0.0970651	0.100699	0.10073	0.112142	0.106139	0.0975027	0.103209	0.106289	0.097587	0.101921	0.110175	0.117387	0.107415	0.110147	0.119726	0.168253	0.185297	0.133166	0.500175	0.489276	0.499076
283	0.0988983	0.101486	0.102114	0.0988983	0.101486	0.102114	0.0989113	0.10034	0.102085	0.11404	0.105906	0.100208	0.10346	0.107149	0.0992295	0.104213	0.110628	0.116264	0.108586	0.113955	0.121936	0.168477	0.187036	0.133583	0.505258	0.492605	0.500223
286	0.0987233	0.1035	0.102191	0.0970651	0.100699	0.10073	0.0988983	0.101486	0.102114	0.113402	0.104412	0.100914	0.103413	0.103822	0.0985753	0.103907	0.107645	0.114964	0.107737	0.111089	0.122447	0.166969	0.183505	0.131916	0.506676	0.497925	0.505837
289	0.099131	0.101123	0.0997801	0.0989113	0.10034	0.102085	0.0987233	0.1035	0.102191	0.111612	0.103516	0.100541	0.103824	0.105496	0.0989414	0.103566	0.109782	0.117813	0.107603	0.112065	0.121832	0.165292	0.183537	0.131759	0.511972	0.502776	0.510717
292	0.0992618	0.101884	0.101809	0.0988983	0.101486	0.102114	0.099131	0.101123	0.0997801	0.111497	0.104877	0.0998571	0.103233	0.106883	0.0989492	0.104235	0.111968	0.117671	0.107774	0.11401	0.12116	0.16409	0.182853	0.129943	0.516336	0.508777	0.513442
295	0.0988983	0.101486	0.102114	0.0987233	0.1035	0.102191	0.0992618	0.101884	0.101809	0.111069	0.103121	0.100415	0.103264	0.105365	0.0985374	0.103953	0.109485	0.116635	0.10731	0.110679	0.118932	0.163067	0.180748	0.12819	0.52099	0.512291	0.518606
298	0.0970651	0.100699	0.10073	0.099131	0.101123	0.0997801	0.0989113	0.10034	0.102085	0.110322	0.103084	0.100677	0.104235	0.105438	0.100802	0.103851	0.109376	0.117133	0.107376	0.11022	0.119294	0.161485	0.17754	0.127205	0.525426	0.515497	0.521835
301	0.0989113	0.10034	0.102085	0.0992618	0.101884	0.101809	0.0988983	0.101486	0.102114	0.111214	0.101391	0.100906	0.103979	0.105511	0.0992262	0.103578	0.110631	0.116968	0.106986	0.110793	0.118314	0.159093	0.17705	0.124653	0.529748	0.517236	0.526121
304	0.0988983	0.101486	0.102114	0.0988983	0.101486	0.102114	0.0987233	0.1035	0.102191	0.110904	0.101955	0.101097	0.103434	0.105744	0.0995381	0.104518	0.109268	0.116676	0.107733	0.108988	0.117517	0.15771	0.175385	0.124373	0.531714	0.520004	0.528756
307	0.0987233	0.1035	0.102191	0.0970651	0.100699	0.10073	0.099131	0.101123	0.0997801	0.110852	0.101915	0.100295	0.103738	0.104838	0.09939	0.10448	0.109433	0.115767	0.107193	0.109981	0.117401	0.156766	0.173891	0.122597	0.534572	0.522286	0.530765
310	0.099131	0.101123	0.0997801	0.0987233	0.1035	0.102191	0.0992618	0.101884	0.101809	0.111306	0.0994773	0.0995061	0.103011	0.10395	0.0995019	0.10403	0.108236	0.115059	0.107097	0.108448	0.117703	0.154983	0.171714	0.123959	0.535278	0.52359	0.534012
313	0.0989113	0.10034	0.102085	0.099131	0.101123	0.0997801	0.0988983	0.101486	0.102114	0.112498	0.101931	0.101367	0.1034	0.106658	0.10029	0.104035	0.109356	0.116247	0.107485	0.110482	0.116645	0.153705	0.170661	0.123131	0.540998	0.529821	0.538685
316	0.0988983	0.101486	0.102114	0.0992618	0.101884	0.101809	0.0970651	0.100699	0.10073	0.115798	0.103062	0.101953	0.104311	0.105929	0.0996441	0.103853	0.109726	0.115555	0.107553	0.109945	0.117183	0.152189	0.170849	0.120912	0.542917	0.531283	0.539976
319	0.0987233	0.1035	0.102191	0.0988983	0.101486	0.102114	0.0989113	0.10034	0.102085	0.113644	0.101278	0.100862	0.103592	0.104406	0.0983007	0.104078	0.109408	0.114157	0.107198	0.109393	0.115794	0.151845	0.169504	0.120647	0.545628	0.535161	0.541823
322	0.099131	0.101123	0.0997801	0.0970651	0.100699	0.10073	0.0988983	0.101486	0.102114	0.114354	0.102516	0.103469	0.103442	0.104586	0.100372	0.1041	0.109592	0.116825	0.107491	0.109688	0.118252	0.150248	0.167446	0.12137	0.547083	0.533138	0.544732
325	0.0992618	0.101884	0.101809	0.0989113	0.10034	0.102085	0.0987233	0.1035	0.102191	0.114038	0.102422	0.1033	0.104115	0.105297	0.100411	0.104069	0.109384	0.116169	0.107646	0.109742	0.117377	0.149123	0.166321	0.120597	0.552739	0.536776	0.547655
328	0.0988983	0.101486	0.102114	0.0988983	0.101486	0.102114	0.099131	0.101123	0.0997801	0.112437	0.102447	0.102118	0.103469	0.106278	0.0998184	0.104108	0.109738	0.117934	0.107978	0.11099	0.117179	0.14786	0.166579	0.120033	0.553362	0.542381	0.550187
331	0.0970651	0.100699	0.10073	0.0987233	0.1035	0.102191	0.0989113	0.10034	0.102085	0.110697	0.101489	0.100612	0.102809	0.105023	0.0992915	0.104369	0.109932	0.116311	0.107788	0.11108	0.116387	0.147694	0.166024	0.120234	0.557372	0.544611	0.552888
334	0.0989113	0.10034	0.102085	0.099131	0.101123	0.0997801	0.0988983	0.101486	0.102114	0.11183	0.10226	0.101484	0.10334	0.105974	0.100474	0.103817	0.110837	0.11748	0.107476	0.111184	0.11572	0.146871	0.164824	0.119039	0.559684	0.548891	0.556293
337	0.0988983	0.101486	0.102114	0.0989113	0.10034	0.102085	0.0987233	0.1035	0.102191	0.112093	0.101854	0.103527	0.103102	0.105057	0.101546	0.10368	0.109405	0.117778	0.107629	0.11226	0.117754	0.145686	0.164627	0.119564	0.562626	0.545412	0.55978
340	0.0989113	0.10034	0.102085	0.0988983	0.101486	0.102114	0.099131	0.101123	0.0997801	0.110552	0.102602	0.103358	0.103378	0.10579	0.100314	0.104268	0.109889	0.118536	0.108126	0.110482	0.117772	0.144806	0.161892	0.118749	0.565593	0.553129	0.56215
343	0.0988983	0.101486	0.102114	0.0987233	0.1035	0.102191	0.0992618	0.101884	0.101809	0.112448	0.102476	0.102152	0.103989	0.106321	0.0995294	0.104335	0.111567	0.117137	0.108113	0.113352	0.116756	0.144268	0.161856	0.117659	0.568919	0.555481	0.56481
346	0.0987233	0.1035	0.102191	0.099131	0.101123	0.0997801	0.0988983	0.101486	0.102114	0.112448	0.102476	0.102152	0.103989	0.106321	0.0995294	0.104335	0.111567	0.117137	0.108113	0.113352	0.116756	0.144268	0.161856	0.117659	0.568919	0.555481	0.56481
349	0.099131	0.101123	0.0997801	0.0992618	0.101884	0.101809	0.0970651	0.100699	0.10073	0.11153	0.10208	0.101799	0.104239	0.104981	0.0993492	0.104166	0.110689	0.116692	0.10806	0.111329	0.115627	0.1437	0.160101	0.116846	0.569672	0.556212	0.566681

[truncated: 2 more sheets: 10^5 cfu per ml, 0 cfu per ml]
